# Supplementary material for: Comorbidity network analysis using graphical models for electronic health records
Source: Frontiers journal article supplement (doi:10.3389/fdata.2023.846202), 2023-08-17
Supplement: Data_Sheet_1.zip [file Data_Sheet_1.zip]

## Sheet: pairwise result
Disease 1	Disease 2	logOR
Effects of reduced temperature	Excessive cold	10.7143
Poisoning by analgesics, antipyretics, and antirheumatics	Accidental poisoning by analgesics, antipyretics, and antirheumatics	10.3855
Toxic effect of alcohol	Accidental poisoning by alcohol, not elsewhere classified	10.3274
Early or threatened labor	Outcome of delivery	9.74317
Other indications for care or intervention related to labor and delivery and not elsewhere classified	Outcome of delivery	9.42468
Infective and parasitic conditions in the mother classifiable elsewhere but complicating pregnancy, childbirth, and the puerperium	Other current conditions in the mother classifiable elsewhere but complicating pregnancy, childbirth, and the puerperium	9.28653
Poisoning by psychotropic agents	Accidental poisoning by tranquilizers	9.09825
Other current conditions in the mother classifiable elsewhere but complicating pregnancy, childbirth, and the puerperium	Outcome of delivery	8.77686
Other current conditions in the mother classifiable elsewhere but complicating pregnancy, childbirth, and the puerperium	Other indications for care or intervention related to labor and delivery and not elsewhere classified	8.52256
Other complications of pregnancy, not elsewhere classified	Other current conditions in the mother classifiable elsewhere but complicating pregnancy, childbirth, and the puerperium	8.41782
Effects of other external causes	Suicide and self-inflicted injury by hanging, strangulation, and suffocation	8.34862
Early or threatened labor	Other current conditions in the mother classifiable elsewhere but complicating pregnancy, childbirth, and the puerperium	8.30671
Hypertension complicating pregnancy, childbirth, and the puerperium	Other current conditions in the mother classifiable elsewhere but complicating pregnancy, childbirth, and the puerperium	8.13413
Disorders relating to short gestation and unspecified low birthweight	Other multiple, mates all liveborn	8.10501
Postpartum hemorrhage	Outcome of delivery	7.91296
Poisoning by central nervous system stimulants	Accidental poisoning by other psychotropic agents	7.90458
Need for prophylactic vaccination and inoculation against bacterial diseases	Need for prophylactic vaccination and inoculation against combinations of diseases	7.89982
Poisoning by other central nervous system depressants and anesthetics	Accidental poisoning by other drugs acting on central and autonomic nervous systems	7.85628
Other current conditions in the mother classifiable elsewhere but complicating pregnancy, childbirth, and the puerperium	Postpartum hemorrhage	7.73601
Poisoning by drugs primarily affecting the autonomic nervous system	Accidental poisoning by other drugs acting on central and autonomic nervous systems	7.60631
Poisoning by agents primarily affecting the cardiovascular system	Accidental poisoning by other drugs	7.55904
Early or threatened labor	Infective and parasitic conditions in the mother classifiable elsewhere but complicating pregnancy, childbirth, and the puerperium	7.42791
Hypertension complicating pregnancy, childbirth, and the puerperium	Early or threatened labor	7.42511
Early or threatened labor	Other indications for care or intervention related to labor and delivery and not elsewhere classified	7.39659
Hypertension complicating pregnancy, childbirth, and the puerperium	Infective and parasitic conditions in the mother classifiable elsewhere but complicating pregnancy, childbirth, and the puerperium	7.37588
Other mycoses	Pneumonia in infectious diseases classified elsewhere	7.26633
Other indications for care or intervention related to labor and delivery and not elsewhere classified	Postpartum hemorrhage	7.13986
Hypertension complicating pregnancy, childbirth, and the puerperium	Outcome of delivery	7.10222
Injury to blood vessels of upper extremity	Injury to peripheral nerve(s) of shoulder girdle and upper limb	7.09799
Foreign body in mouth, esophagus, and stomach	Foreign body accidentally entering other orifice	7.03348
Late effects of musculoskeletal and connective tissue injuries	Late effects of accidental injury	6.96943
Need for prophylactic vaccination and inoculation against certain viral diseases	Need for prophylactic vaccination and inoculation against combinations of diseases	6.9622
Hypertension complicating pregnancy, childbirth, and the puerperium	Other complications of pregnancy, not elsewhere classified	6.90575
Early or threatened labor	Other complications of pregnancy, not elsewhere classified	6.80628
Dislocation of knee	Injury to blood vessels of lower extremity and unspecified sites	6.79519
Hypertension complicating pregnancy, childbirth, and the puerperium	Other indications for care or intervention related to labor and delivery and not elsewhere classified	6.78792
Other complications of pregnancy, not elsewhere classified	Infective and parasitic conditions in the mother classifiable elsewhere but complicating pregnancy, childbirth, and the puerperium	6.78573
Sarcoidosis	Lung involvement in conditions classified elsewhere	6.73647
Infective and parasitic conditions in the mother classifiable elsewhere but complicating pregnancy, childbirth, and the puerperium	Outcome of delivery	6.73439
Late effects of injuries to the nervous system	Late effects of accidental injury	6.72676
Other current conditions in the mother classifiable elsewhere but complicating pregnancy, childbirth, and the puerperium	Other and unspecified complications of the puerperium, not elsewhere classified	6.69701
Secondary diabetes mellitus	Hormones and synthetic substitutes causing adverse effects in therapeutic use	6.65393
Early or threatened labor	Postpartum hemorrhage	6.59129
Hypertension complicating pregnancy, childbirth, and the puerperium	Other and unspecified complications of the puerperium, not elsewhere classified	6.57802
Poisoning by primarily systemic agents	Suicide and self-inflicted poisoning by solid or liquid substances	6.49369
Inflammatory disease of ovary, fallopian tube, pelvic cellular tissue, and peritoneum	Endometriosis	6.4311
Need for prophylactic vaccination and inoculation against bacterial diseases	Need for prophylactic vaccination and inoculation against certain viral diseases	6.42312
Acute and subacute endocarditis	Septic arterial embolism	6.41797
Poisoning by anticonvulsants and anti-Parkinsonism drugs	Accidental poisoning by other drugs acting on central and autonomic nervous systems	6.38142
Other and unspecified complications of the puerperium, not elsewhere classified	Outcome of delivery	6.28697
Disorders of mineral metabolism	Crystal arthropathies	6.275
Superficial injury of elbow, forearm, and wrist	Superficial injury of hip, thigh, leg, and ankle	6.24609
Open wound of chest (wall)	Assault by cutting and piercing instrument	6.23272
Septicemia	Certain adverse effects, not elsewhere classified	6.22324
Uterine leiomyoma	Disorders of menstruation and other abnormal bleeding from female genital tract	6.22322
Poisoning by anticonvulsants and anti-Parkinsonism drugs	Suicide and self-inflicted poisoning by solid or liquid substances	6.16889
Infective and parasitic conditions in the mother classifiable elsewhere but complicating pregnancy, childbirth, and the puerperium	Other indications for care or intervention related to labor and delivery and not elsewhere classified	6.08066
Open wound of neck	Suicide and self-inflicted injury by cutting and piercing instruments	6.07904
Injury to blood vessels of upper extremity	Accidents caused by machinery	6.0708
Poisoning by psychotropic agents	Suicide and self-inflicted poisoning by solid or liquid substances	6.06707
Open wound of finger(s)	Injury to blood vessels of upper extremity	6.06359
Postpartum hemorrhage	Other and unspecified complications of the puerperium, not elsewhere classified	6.05695
Hypertension complicating pregnancy, childbirth, and the puerperium	Postpartum hemorrhage	6.04946
Foreign body in trachea, bronchus, and lung	Inhalation and ingestion of other object causing obstruction of respiratory tract or suffocation	6.03869
Respiratory conditions due to other and unspecified external agents	Late effects of other and unspecified external causes	6.01267
Disorders relating to short gestation and unspecified low birthweight	Respiratory distress syndrome	5.99256
Other arthropod-borne diseases	Acute myocarditis	5.98424
Other indications for care or intervention related to labor and delivery and not elsewhere classified	Other and unspecified complications of the puerperium, not elsewhere classified	5.96843
Open wound of other and unspecified sites, except limbs	Assault by cutting and piercing instrument	5.92499
Other complications of pregnancy, not elsewhere classified	Outcome of delivery	5.90981
Early or threatened labor	Other and unspecified complications of the puerperium, not elsewhere classified	5.89419
Open wound of elbow, forearm, and wrist	Injury to blood vessels of upper extremity	5.89089
Foreign body in mouth, esophagus, and stomach	Inhalation and ingestion of food causing obstruction of respiratory tract or suffocation	5.8778
Accidental poisoning by tranquilizers	Accidental poisoning by other psychotropic agents	5.85059
Open wound of finger(s)	Injury to peripheral nerve(s) of shoulder girdle and upper limb	5.82283
Injury to peripheral nerve(s) of shoulder girdle and upper limb	Accidents caused by machinery	5.80455
Open wound of shoulder and upper arm	Assault by cutting and piercing instrument	5.80248
Open wound of elbow, forearm, and wrist	Suicide and self-inflicted injury by cutting and piercing instruments	5.79853
Other complications of pregnancy, not elsewhere classified	Other indications for care or intervention related to labor and delivery and not elsewhere classified	5.77825
Congenital anomalies of ear, face, and neck	Cleft palate and cleft lip	5.77825
Disorders relating to long gestation and high birthweight	Single liveborn	5.76393
Open wound of finger(s)	Accidents caused by machinery	5.7221
Malignant neoplasm of body of uterus	Inflammatory disease of ovary, fallopian tube, pelvic cellular tissue, and peritoneum	5.72199
Fetus or newborn affected by maternal complications of pregnancy	Disorders relating to short gestation and unspecified low birthweight	5.71244
Foreign body in pharynx and larynx	Inhalation and ingestion of other object causing obstruction of respiratory tract or suffocation	5.68579
Endometriosis	Disorders of menstruation and other abnormal bleeding from female genital tract	5.68097
Poisoning by psychotropic agents	Accidental poisoning by other psychotropic agents	5.66901
Injury to blood vessels of upper extremity	Suicide and self-inflicted injury by cutting and piercing instruments	5.66509
Open wound of chest (wall)	Open wound of shoulder and upper arm	5.63649
Fracture of pelvis	Dislocation of hip	5.61605
Open wound of shoulder and upper arm	Open wound of finger(s)	5.5544
Open wound of shoulder and upper arm	Open wound of hip and thigh	5.55307
Fracture of one or more phalanges of hand	Accidents caused by machinery	5.53087
Open wound of other and unspecified sites, except limbs	Open wound of shoulder and upper arm	5.52771
Dermatitis due to substances taken internally	Antibiotics causing adverse effects in therapeutic use	5.49249
Benign neoplasm of ovary	Noninflammatory disorders of ovary, fallopian tube, and broad ligament	5.48821
Diseases of mitral and aortic valves	Other rheumatic heart disease	5.47175
Fracture of carpal bone(s)	Fracture of metacarpal bone(s)	5.45141
Injury to gastrointestinal tract	Assault by firearms and explosives	5.45009
Fracture of face bones	Open wound of ocular adnexa	5.43858
Disorders relating to short gestation and unspecified low birthweight	Twin, mate liveborn	5.4079
Varicose veins of other sites	Chronic liver disease and cirrhosis	5.36181
Unspecified intellectual disabilities	Infantile cerebral palsy	5.35481
Accidental poisoning by tranquilizers	Accidental poisoning by alcohol, not elsewhere classified	5.30354
Poisoning by analgesics, antipyretics, and antirheumatics	Suicide and self-inflicted poisoning by solid or liquid substances	5.29476
Uterine leiomyoma	Endometriosis	5.27641
Superficial injury of trunk	Superficial injury of hip, thigh, leg, and ankle	5.27571
Hypertensive renal disease	Chronic renal failure	5.27534
Open wound of chest (wall)	Open wound of other and unspecified sites, except limbs	5.24063
Uterine leiomyoma	Noninflammatory disorders of ovary, fallopian tube, and broad ligament	5.22297
Poisoning by primarily systemic agents	Poisoning by analgesics, antipyretics, and antirheumatics	5.21961
Other diseases due to viruses and Chlamydiae	Pneumonia in infectious diseases classified elsewhere	5.20681
Other arthropod-borne diseases	Acquired hemolytic anemias	5.20581
Accidental poisoning by other psychotropic agents	Accidental poisoning by other drugs acting on central and autonomic nervous systems	5.20035
Fracture of one or more phalanges of hand	Injury to blood vessels of upper extremity	5.19583
Need for other prophylactic vaccination and inoculation against single diseases	Single liveborn	5.19498
Superficial injury of face, neck, and scalp except eye	Superficial injury of hip, thigh, leg, and ankle	5.1919
Open wound of elbow, forearm, and wrist	Injury to peripheral nerve(s) of shoulder girdle and upper limb	5.1891
Injury to other and unspecified intrathoracic organs	Assault by firearms and explosives	5.17504
Injury to blood vessels of head and neck	Injury to blood vessels of thorax	5.16077
Open wound of other and unspecified sites, except limbs	Open wound of hip and thigh	5.16054
Osteomyelitis, periostitis, and other infections involving bone	Osteitis deformans and osteopathies associated with other disorders classified elsewhere	5.15821
Fracture of rib(s), sternum, larynx, and trachea	Traumatic pneumothorax and hemothorax	5.15387
Fracture of tibia and fibula	Motor vehicle traffic accident involving collision with pedestrian	5.14207
Encephalitis, myelitis, and encephalomyelitis	Other demyelinating diseases of central nervous system	5.13632
Accidental poisoning by other drugs acting on central and autonomic nervous systems	Accidental poisoning by other drugs	5.13632
Disorders relating to short gestation and unspecified low birthweight	Other perinatal jaundice	5.12504
Open wound of neck	Assault by cutting and piercing instrument	5.12455
Fracture of tibia and fibula	Dislocation of knee	5.10887
Injury to pelvic organs	Other and unspecified environmental and accidental causes	5.09756
Poisoning by sedatives and hypnotics	Suicide and self-inflicted poisoning by solid or liquid substances	5.09727
Need for isolation and other prophylactic measures	Personal history of allergy to medicinal agents	5.08467
Foreign body in pharynx and larynx	Foreign body accidentally entering other orifice	5.08035
Fracture of one or more phalanges of hand	Open wound of finger(s)	5.07104
Open wound of hand except finger(s) alone	Open wound of finger(s)	5.07104
Open wound of neck	Open wound of shoulder and upper arm	5.06987
Dislocation of shoulder	Open wound of hip and thigh	5.06737
Cystitis	Late effects of other and unspecified external causes	5.06547
Varicose veins of other sites	Liver abscess and sequelae of chronic liver disease	5.04457
Open wound of neck	Injury to blood vessels of head and neck	5.04168
Other, multiple, and ill-defined dislocations	Spinal cord injury without evidence of spinal bone injury	5.04012
Injury to gastrointestinal tract	Injury to other intra-abdominal organs	5.0388
Respiratory distress syndrome	Other perinatal jaundice	5.03863
Poisoning by analgesics, antipyretics, and antirheumatics	Poisoning by solid or liquid substances, undetermined whether accidentally or purposely inflicted	5.0368
Open wound of shoulder and upper arm	Injury to blood vessels of upper extremity	5.03391
Poisoning by drugs primarily affecting the autonomic nervous system	Suicide and self-inflicted poisoning by solid or liquid substances	5.03262
Poisoning by central nervous system stimulants	Accidental poisoning by tranquilizers	5.02639
Fracture of rib(s), sternum, larynx, and trachea	Fracture of scapula	5.02257
Poisoning by anticonvulsants and anti-Parkinsonism drugs	Poisoning by psychotropic agents	5.01243
Accidental poisoning by analgesics, antipyretics, and antirheumatics	Accidental poisoning by tranquilizers	5.00432
Diseases due to other mycobacteria	Bronchiectasis	4.99622
Open wound of hand except finger(s) alone	Injury to blood vessels of upper extremity	4.99499
Contusion of eye and adnexa	Contusion of upper limb	4.98593
Chronic liver disease and cirrhosis	Liver abscess and sequelae of chronic liver disease	4.97544
Other disorders of middle ear and mastoid	Fracture of base of skull	4.96395
Open wound of neck	Open wound of other and unspecified sites, except limbs	4.96157
Open wound of elbow, forearm, and wrist	Open wound of finger(s)	4.95631
Traumatic pneumothorax and hemothorax	Injury to heart and lung	4.92022
Other specified intellectual disabilities	Infantile cerebral palsy	4.90431
Fracture of one or more phalanges of hand	Injury to peripheral nerve(s) of shoulder girdle and upper limb	4.8935
Open wound of hand except finger(s) alone	Injury to peripheral nerve(s) of shoulder girdle and upper limb	4.8935
Endometriosis	Noninflammatory disorders of ovary, fallopian tube, and broad ligament	4.88548
Poisoning by central nervous system stimulants	Toxic effect of alcohol	4.88527
Injury to blood vessels of head and neck	Suicide and self-inflicted injury by cutting and piercing instruments	4.88353
Poisoning by psychotropic agents	Toxic effect of alcohol	4.88057
Traumatic pneumothorax and hemothorax	Injury to other and unspecified intrathoracic organs	4.85898
Fetus or newborn affected by maternal conditions which may be unrelated to present pregnancy	Fetus or newborn affected by maternal complications of pregnancy	4.84494
Injury to other and unspecified intrathoracic organs	Open wound of chest (wall)	4.83704
Intracranial and intraspinal abscess	Osteomyelitis, periostitis, and other infections involving bone	4.82098
Infections of kidney	Calculus of kidney and ureter	4.81645
Chronic glomerulonephritis	Diffuse diseases of connective tissue	4.81011
Senile and presenile organic psychotic conditions	Other and ill-defined cerebrovascular disease	4.79077
Fracture of tibia and fibula	Injury to blood vessels of lower extremity and unspecified sites	4.78508
Infections of kidney	Hydronephrosis	4.78294
Toxic effect of alcohol	Poisoning by solid or liquid substances, undetermined whether accidentally or purposely inflicted	4.77392
Injury to other and unspecified intrathoracic organs	Assault by cutting and piercing instrument	4.76064
Foreign body in trachea, bronchus, and lung	Inhalation and ingestion of food causing obstruction of respiratory tract or suffocation	4.75599
Hydrocele	Other disorders of male genital organs	4.7534
Hydronephrosis	Calculus of kidney and ureter	4.74862
Other and unspecified infectious and parasitic diseases	Encephalitis, myelitis, and encephalomyelitis	4.74834
Disorders relating to short gestation and unspecified low birthweight	Hematological disorders of fetus and newborn	4.74808
Fracture of base of skull	Fracture of face bones	4.74342
Diseases of hard tissues of teeth	Gingival and periodontal diseases	4.74242
Open wound of finger(s)	Assault by cutting and piercing instrument	4.74041
Poisoning by other central nervous system depressants and anesthetics	Poisoning by psychotropic agents	4.73483
Fracture of rib(s), sternum, larynx, and trachea	Fracture of clavicle	4.72806
Sprains and strains of knee and leg	Motor vehicle traffic accident involving collision with pedestrian	4.7227
Alcoholic psychoses	Alcohol dependence syndrome	4.71822
Other disorders of pancreatic internal secretion	Hormones and synthetic substitutes causing adverse effects in therapeutic use	4.70641
Other arthropod-borne diseases	Facial nerve disorders	4.70428
Poisoning by agents primarily affecting the cardiovascular system	Suicide and self-inflicted poisoning by solid or liquid substances	4.70422
Fracture of metacarpal bone(s)	Fracture of one or more phalanges of hand	4.6945
Fracture of metacarpal bone(s)	Open wound of hand except finger(s) alone	4.6945
Other congenital anomalies of upper alimentary tract	Foreign body in mouth, esophagus, and stomach	4.69264
Open wound of shoulder and upper arm	Assault by firearms and explosives	4.69231
Arterial embolism and thrombosis	Septic arterial embolism	4.69041
Observation and evaluation of newborns and infants for suspected condition not found	Single liveborn	4.68726
Poisoning by sedatives and hypnotics	Poisoning by psychotropic agents	4.68166
Accidental poisoning by analgesics, antipyretics, and antirheumatics	Accidental poisoning by other drugs acting on central and autonomic nervous systems	4.67864
Noninflammatory disorders of ovary, fallopian tube, and broad ligament	Disorders of menstruation and other abnormal bleeding from female genital tract	4.67684
Myoneural disorders	Other disorders of eyelids	4.67556
Thiamine and niacin deficiency states	Alcoholic psychoses	4.6716
Fracture of ankle	Fracture of one or more tarsal and metatarsal bones	4.67114
Excessive cold	Housing, household, and economic circumstances	4.66172
Other disorders of eyelids	Strabismus and other disorders of binocular eye movements	4.65329
Human immunodeficiency virus [HIV] disease	Other and unspecified infectious and parasitic diseases	4.65236
Foreign body in trachea, bronchus, and lung	Foreign body accidentally entering other orifice	4.64188
Fracture of patella	Fracture of tibia and fibula	4.63993
Fracture of tibia and fibula	Sprains and strains of knee and leg	4.63666
Other complications of procedures, not elsewhere classified	Accidental cut, puncture, perforation, or hemorrhage during medical care	4.62699
Hematological disorders of fetus and newborn	Need for prophylactic vaccination and inoculation against combinations of diseases	4.61391
Fracture of rib(s), sternum, larynx, and trachea	Injury to heart and lung	4.60973
Toxic effect of alcohol	Suicide and self-inflicted poisoning by solid or liquid substances	4.60449
Inflammatory disease of ovary, fallopian tube, pelvic cellular tissue, and peritoneum	Noninflammatory disorders of ovary, fallopian tube, and broad ligament	4.58803
Injury to liver	Injury to kidney	4.57124
Fracture of other and unspecified parts of femur	Fracture of patella	4.56647
Other perinatal jaundice	Hematological disorders of fetus and newborn	4.56251
Poisoning by psychotropic agents	Poisoning by central nervous system stimulants	4.55259
Open wound of hand except finger(s) alone	Assault by cutting and piercing instrument	4.54918
Respiratory distress syndrome	Hematological disorders of fetus and newborn	4.53515
Injury to gastrointestinal tract	Injury to blood vessels of abdomen and pelvis	4.53447
Fracture of scapula	Traumatic pneumothorax and hemothorax	4.53405
Toxic effect of alcohol	Accidental poisoning by tranquilizers	4.53296
Specific nonpsychotic mental disorders following organic brain damage	Late effects of injuries to the nervous system	4.53259
Other paralytic syndromes	Late effects of injuries to the nervous system	4.52822
Open wound of elbow, forearm, and wrist	Open wound of hip and thigh	4.52007
Poisoning by sedatives and hypnotics	Toxic effect of alcohol	4.50995
Injury to other and unspecified intrathoracic organs	Open wound of other and unspecified sites, except limbs	4.50352
Need for other prophylactic vaccination and inoculation against single diseases	Observation and evaluation of newborns and infants for suspected condition not found	4.49775
Fracture of clavicle	Fracture of scapula	4.48409
Accidental poisoning by other psychotropic agents	Accidental poisoning by other drugs	4.48148
Poisoning by psychotropic agents	Poisoning by solid or liquid substances, undetermined whether accidentally or purposely inflicted	4.47911
Dermatitis due to substances taken internally	Anticonvulsants and anti-Parkinsonism drugs causing adverse effects in therapeutic use	4.47402
Injury to other and unspecified intrathoracic organs	Injury to gastrointestinal tract	4.45776
Open wound of elbow, forearm, and wrist	Open wound of hand except finger(s) alone	4.4545
Injury to liver	Injury to other intra-abdominal organs	4.45014
Traumatic pneumothorax and hemothorax	Injury to blood vessels of thorax	4.45001
Other diseases due to viruses and Chlamydiae	Other and unspecified infectious and parasitic diseases	4.44479
Infections specific to the perinatal period	Hematological disorders of fetus and newborn	4.43947
Thiamine and niacin deficiency states	Alcohol dependence syndrome	4.4386
Accidental poisoning by analgesics, antipyretics, and antirheumatics	Accidental poisoning by alcohol, not elsewhere classified	4.43768
Other diseases due to viruses and Chlamydiae	Disorders involving the immune mechanism	4.43754
Birth trauma	Single liveborn	4.43715
Disorders relating to short gestation and unspecified low birthweight	Other respiratory conditions of fetus and newborn	4.42502
Accidental poisoning by analgesics, antipyretics, and antirheumatics	Accidental poisoning by other psychotropic agents	4.42296
Uterine leiomyoma	Pain and other symptoms associated with female genital organs	4.41508
Dislocation of hip	Open wound of knee, leg [except thigh], and ankle	4.41507
Poisoning by psychotropic agents	Poisoning by agents primarily affecting the cardiovascular system	4.41404
Injury to other intra-abdominal organs	Injury to blood vessels of abdomen and pelvis	4.41247
Fracture of radius and ulna	Fracture of carpal bone(s)	4.41216
Cleft palate and cleft lip	Other congenital musculoskeletal anomalies	4.41047
Foreign body in pharynx and larynx	Inhalation and ingestion of food causing obstruction of respiratory tract or suffocation	4.40081
Disorders relating to short gestation and unspecified low birthweight	Other and ill-defined conditions originating in the perinatal period	4.40024
Fracture of metacarpal bone(s)	Injury to blood vessels of upper extremity	4.39723
Injury to gastrointestinal tract	Assault by cutting and piercing instrument	4.39717
Injury to other intra-abdominal organs	Assault by firearms and explosives	4.39664
Dislocation of hip	Other motor vehicle traffic accident involving collision with another motor vehicle	4.39536
Injury to other and unspecified intrathoracic organs	Suicide and self-inflicted injury by cutting and piercing instruments	4.38873
Personality disorders	Poisoning by agents primarily affecting the cardiovascular system	4.38834
Other congenital anomalies of nervous system	Congenital anomalies of ear, face, and neck	4.38813
Fracture of humerus	Injury to peripheral nerve(s) of shoulder girdle and upper limb	4.37754
Open wound of shoulder and upper arm	Open wound of elbow, forearm, and wrist	4.37565
Disorders relating to short gestation and unspecified low birthweight	Infections specific to the perinatal period	4.37559
Fracture of other and unspecified parts of femur	Fracture of tibia and fibula	4.36657
Other congenital anomalies of nervous system	Congenital anomalies of eye	4.34728
Diseases of mitral valve	Other rheumatic heart disease	4.34216
Injury to blood vessels of lower extremity and unspecified sites	Certain early complications of trauma	4.33218
Poisoning by other central nervous system depressants and anesthetics	Asymptomatic human immunodeficiency virus [HIV] infection status	4.33188
Traumatic pneumothorax and hemothorax	Assault by cutting and piercing instrument	4.32425
Injury to spleen	Injury to other intra-abdominal organs	4.31244
Disorders involving the immune mechanism	Viral pneumonia	4.30591
Infections specific to the perinatal period	Perinatal disorders of digestive system	4.30495
Fracture of rib(s), sternum, larynx, and trachea	Injury to blood vessels of thorax	4.29446
Dislocation of hip	Other motor vehicle traffic accident involving collision on the highway	4.28807
Empyema	Abscess of lung and mediastinum	4.2787
Fracture of ankle	Fracture of one or more phalanges of foot	4.27246
Poisoning by central nervous system stimulants	Accidental poisoning by analgesics, antipyretics, and antirheumatics	4.27129
Injury to spleen	Injury to kidney	4.26846
Open wound of other and unspecified sites, except limbs	Open wound of elbow, forearm, and wrist	4.26735
Injury to gastrointestinal tract	Injury to liver	4.26608
Fracture of ankle	Open wound of knee, leg [except thigh], and ankle	4.25803
Respiratory distress syndrome	Infections specific to the perinatal period	4.2547
Injury to other and unspecified intrathoracic organs	Injury to liver	4.2465
Malignant neoplasm of trachea, bronchus, and lung	Bronchopneumonia, organism unspecified	4.24634
Cellulitis and abscess of finger and toe	Osteitis deformans and osteopathies associated with other disorders classified elsewhere	4.24475
Other perinatal jaundice	Other and ill-defined conditions originating in the perinatal period	4.23809
Other diseases of spinal cord	Other paralytic syndromes	4.22651
Poisoning by analgesics, antipyretics, and antirheumatics	Poisoning by psychotropic agents	4.22312
Other specified intellectual disabilities	Chromosomal anomalies	4.2201
Injury to kidney	Injury to other intra-abdominal organs	4.21487
Fracture of patella	Other motor vehicle traffic accident involving collision with another motor vehicle	4.21295
Fracture of vertebral column without mention of spinal cord lesion	Fracture of pelvis	4.21112
Fracture of pelvis	Injury to blood vessels of abdomen and pelvis	4.20973
Fetal and neonatal hemorrhage	Hematological disorders of fetus and newborn	4.20592
Need for other prophylactic vaccination and inoculation against single diseases	Elective surgery for purposes other than remedying health states	4.20501
Other and ill-defined conditions originating in the perinatal period	Need for prophylactic vaccination and inoculation against combinations of diseases	4.20297
Personality disorders	Suicide and self-inflicted poisoning by solid or liquid substances	4.19066
Arthropathy associated with infections	Other derangement of joint	4.19024
Sprains and strains of shoulder and upper arm	Other and unspecified environmental and accidental causes	4.18831
Fracture of carpal bone(s)	Injury to kidney	4.1875
Suicide and self-inflicted injury by cutting and piercing instruments	Other psychosocial circumstances	4.18458
Fracture of tibia and fibula	Fracture of ankle	4.18351
Superficial injury of other, multiple, and unspecified sites	Motor vehicle traffic accident involving collision with pedestrian	4.18349
Fracture of scapula	Injury to heart and lung	4.17124
Phlebitis and thrombophlebitis	Complications of medical care, not elsewhere classified	4.16655
Superficial injury of eye and adnexa	Other and unspecified environmental and accidental causes	4.16505
Poisoning by analgesics, antipyretics, and antirheumatics	Accidental poisoning by tranquilizers	4.16093
Diseases of the oral soft tissues, excluding lesions specific for gingiva and tongue	Primarily systemic agents causing adverse effects in therapeutic use	4.15047
Other respiratory conditions of fetus and newborn	Other perinatal jaundice	4.15008
Infections specific to the perinatal period	Other perinatal jaundice	4.14842
Fracture of vault of skull	Fracture of base of skull	4.14604
Contusion of face, scalp, and neck except eye(s)	Contusion of upper limb	4.1397
Secondary hypertension	Atherosclerosis	4.1378
Injury to other and unspecified intrathoracic organs	Injury to blood vessels of abdomen and pelvis	4.12868
Fracture of radius and ulna	Fracture of metacarpal bone(s)	4.12733
Open wound of ocular adnexa	Other open wound of head	4.12704
Dislocation of hip	Injury to heart and lung	4.12431
Hematological disorders of fetus and newborn	Perinatal disorders of digestive system	4.117
Open wound of elbow, forearm, and wrist	Assault by cutting and piercing instrument	4.11117
Respiratory distress syndrome	Need for prophylactic vaccination and inoculation against combinations of diseases	4.11033
Fetus or newborn affected by maternal complications of pregnancy	Other multiple, mates all liveborn	4.10798
Contusion of eye and adnexa	Assault by other and unspecified means	4.10158
Dermatitis due to substances taken internally	Other anti-infectives causing adverse effects in therapeutic use	4.10112
Injury to heart and lung	Open wound of hip and thigh	4.09939
Other respiratory conditions of fetus and newborn	Hematological disorders of fetus and newborn	4.09759
Other congenital anomalies of circulatory system	Hematological disorders of fetus and newborn	4.09612
Secondary malignant neoplasm of respiratory and digestive systems	Secondary malignant neoplasm of other specified sites	4.09578
Injury to liver	Assault by firearms and explosives	4.09243
Injury to other and unspecified intrathoracic organs	Certain early complications of trauma	4.0924
Fracture of face bones	Assault by other and unspecified means	4.09218
Drug psychoses	Psychotropic agents causing adverse effects in therapeutic use	4.0916
Fracture of tibia and fibula	Fracture of one or more tarsal and metatarsal bones	4.08796
Respiratory distress syndrome	Fetal and neonatal hemorrhage	4.08672
Injury to other and unspecified intrathoracic organs	Injury to spleen	4.08555
Malignant neoplasm of ovary and other uterine adnexa	Secondary malignant neoplasm of respiratory and digestive systems	4.07679
Fracture of vertebral column without mention of spinal cord lesion	Fracture of scapula	4.07651
Poisoning by other central nervous system depressants and anesthetics	Suicide and self-inflicted poisoning by solid or liquid substances	4.07429
Fracture of vertebral column with spinal cord lesion	Spinal cord injury without evidence of spinal bone injury	4.0676
Pilonidal cyst	Single liveborn	4.06663
Fracture of clavicle	Traumatic pneumothorax and hemothorax	4.06277
Other and unspecified infectious and parasitic diseases	Pneumonia in infectious diseases classified elsewhere	4.06249
Injury to blood vessels of abdomen and pelvis	Certain early complications of trauma	4.06017
Other perinatal jaundice	Other multiple, mates all liveborn	4.05655
Traumatic pneumothorax and hemothorax	Certain early complications of trauma	4.05393
Disorders relating to short gestation and unspecified low birthweight	Need for prophylactic vaccination and inoculation against combinations of diseases	4.0512
Poisoning by analgesics, antipyretics, and antirheumatics	Poisoning by central nervous system stimulants	4.05087
Pneumonia in infectious diseases classified elsewhere	Abscess of lung and mediastinum	4.04829
Fetal and neonatal hemorrhage	Perinatal disorders of digestive system	4.04216
Poisoning by analgesics, antipyretics, and antirheumatics	Toxic effect of alcohol	4.04205
Atopic dermatitis and related conditions	Disorders relating to short gestation and unspecified low birthweight	4.03381
Multiple sclerosis	Other demyelinating diseases of central nervous system	4.03318
Fracture of face bones	Fracture of one or more phalanges of foot	4.03139
Injury to heart and lung	Other motor vehicle nontraffic accident involving collision with stationary object	4.02761
Infections specific to the perinatal period	Fetal and neonatal hemorrhage	4.02351
Uterine leiomyoma	Inflammatory disease of ovary, fallopian tube, pelvic cellular tissue, and peritoneum	4.01942
Open wound of neck	Open wound of elbow, forearm, and wrist	4.01865
Fracture of pelvis	Motor vehicle traffic accident involving collision with pedestrian	4.01693
Fracture of neck of femur	Dislocation of hip	4.01664
Fracture of vault of skull	Assault by other and unspecified means	4.0161
Traumatic pneumothorax and hemothorax	Injury to liver	4.01124
Disorders relating to short gestation and unspecified low birthweight	Fetal and neonatal hemorrhage	4.00928
Lymphoid leukemia	Disorders involving the immune mechanism	4.00793
Open wound of shoulder and upper arm	Open wound of knee, leg [except thigh], and ankle	4.00779
Slow fetal growth and fetal malnutrition	Disorders relating to short gestation and unspecified low birthweight	4.00627
Fracture of rib(s), sternum, larynx, and trachea	Fracture of one or more phalanges of foot	4.00304
Other demyelinating diseases of central nervous system	Other paralytic syndromes	4.00235
Fracture of metacarpal bone(s)	Motor vehicle traffic accident involving collision with other vehicle	4.00057
Disorders involving the immune mechanism	Pneumonia in infectious diseases classified elsewhere	3.9997
Arthropathy associated with infections	Other disorders of synovium, tendon, and bursa	3.99343
Injury to liver	Injury to spleen	3.99325
Human immunodeficiency virus [HIV] disease	Other diseases due to viruses and Chlamydiae	3.99294
Myeloid leukemia	Pneumonia in infectious diseases classified elsewhere	3.99156
Other diseases due to viruses and Chlamydiae	Diseases of the oral soft tissues, excluding lesions specific for gingiva and tongue	3.98948
Disorders relating to short gestation and unspecified low birthweight	Perinatal disorders of digestive system	3.98876
Respiratory distress syndrome	Perinatal disorders of digestive system	3.97324
Myeloid leukemia	Diseases of the oral soft tissues, excluding lesions specific for gingiva and tongue	3.97288
Single liveborn	Elective surgery for purposes other than remedying health states	3.97107
Fracture of other and unspecified parts of femur	Injury to blood vessels of lower extremity and unspecified sites	3.97062
Fetal and neonatal hemorrhage	Other perinatal jaundice	3.96666
Fracture of face bones	Contusion of eye and adnexa	3.96439
Fracture of radius and ulna	Fracture of one or more tarsal and metatarsal bones	3.96187
Drug dependence	Poisoning by solid or liquid substances, undetermined whether accidentally or purposely inflicted	3.94714
Cleft palate and cleft lip	Single liveborn	3.94694
Injury to other and unspecified intrathoracic organs	Injury to kidney	3.94638
Injury to blood vessels of abdomen and pelvis	Assault by cutting and piercing instrument	3.9454
Injury to other intra-abdominal organs	Assault by cutting and piercing instrument	3.94422
Fracture of radius and ulna	Fracture of one or more phalanges of hand	3.94183
Acute glomerulonephritis	Antibiotics causing adverse effects in therapeutic use	3.94116
Fracture of face bones	Fight, brawl, and rape	3.93967
Poisoning by psychotropic agents	Accidental poisoning by other drugs acting on central and autonomic nervous systems	3.93912
Other respiratory conditions of fetus and newborn	Other and ill-defined conditions originating in the perinatal period	3.93868
Respiratory distress syndrome	Other and ill-defined conditions originating in the perinatal period	3.93811
Diseases of hard tissues of teeth	Other diseases and conditions of the teeth and supporting structures	3.93185
Poisoning by analgesics, antipyretics, and antirheumatics	Poisoning by anticonvulsants and anti-Parkinsonism drugs	3.92866
Other congenital anomalies of circulatory system	Respiratory distress syndrome	3.92334
Injury to gastrointestinal tract	Injury to kidney	3.92025
Fracture of one or more phalanges of hand	Fracture of ankle	3.91998
Fracture of pelvis	Fracture of tibia and fibula	3.91997
Malignant neoplasm of larynx	Other diseases of respiratory system	3.91399
Varicose veins of other sites	Other disorders of stomach and duodenum	3.91376
Portal vein thrombosis	Varicose veins of other sites	3.91329
Other respiratory conditions of fetus and newborn	Infections specific to the perinatal period	3.91152
Intracranial and intraspinal abscess	Intervertebral disc disorders	3.9101
Fracture of patella	Fracture of ankle	3.90832
Bacterial meningitis	Intracranial and intraspinal abscess	3.89762
Fracture of rib(s), sternum, larynx, and trachea	Injury to spleen	3.89742
Fracture of vertebral column with spinal cord lesion	Other, multiple, and ill-defined dislocations	3.89107
Hematological disorders of fetus and newborn	Other and ill-defined conditions originating in the perinatal period	3.89031
Hematological disorders of fetus and newborn	Need for prophylactic vaccination and inoculation against bacterial diseases	3.8897
Affective psychoses	Poisoning by anticonvulsants and anti-Parkinsonism drugs	3.88728
Obesity and other hyperalimentation	Body mass index	3.88472
Fracture of humerus	Dislocation of shoulder	3.8825
Fracture of other and unspecified parts of femur	Fracture of one or more tarsal and metatarsal bones	3.8763
Sprains and strains of knee and leg	Injury to heart and lung	3.87487
Dislocation of hip	Injury to spleen	3.87166
Open wound of ear	Motor vehicle traffic accident due to loss of control, without collision on the highway	3.86638
Injury to heart and lung	Motor vehicle traffic accident due to loss of control, without collision on the highway	3.86267
Injury to liver	Other motor vehicle traffic accident involving collision on the highway	3.86056
Traumatic pneumothorax and hemothorax	Open wound of chest (wall)	3.85055
Fracture of ankle	Intracranial injury of other and unspecified nature	3.84943
Disorders of the orbit	Fracture of face bones	3.84676
Fracture of face bones	Other open wound of head	3.83468
Poisoning by primarily systemic agents	Poisoning by psychotropic agents	3.83363
Fracture of base of skull	Open wound of ocular adnexa	3.83259
Personality disorders	Adjustment reaction	3.83054
Other noninfective gastroenteritis and colitis	Anal fissure and fistula	3.82595
Injury to heart and lung	Certain early complications of trauma	3.82262
Other diseases due to viruses and Chlamydiae	Other mycoses	3.82045
Need for other prophylactic vaccination and inoculation against single diseases	Health supervision of infant or child	3.81822
Acute pericarditis	Other diseases of pericardium	3.81793
Fracture of base of skull	Fracture of one or more phalanges of foot	3.81443
Injury to liver	Open wound of chest (wall)	3.81394
Affective psychoses	Suicide and self-inflicted poisoning by solid or liquid substances	3.81282
Fracture of vault of skull	Fracture of face bones	3.80786
Fracture of humerus	Motor vehicle traffic accident involving collision with pedestrian	3.80672
Fracture of clavicle	Pedal cycle accident	3.80659
Injury to kidney	Injury to blood vessels of abdomen and pelvis	3.80261
Other perinatal jaundice	Need for prophylactic vaccination and inoculation against combinations of diseases	3.80214
Contusion of lower limb and of other and unspecified sites	Striking against or struck accidentally by objects or persons	3.80047
Other perinatal jaundice	Perinatal disorders of digestive system	3.79971
Need for other prophylactic vaccination and inoculation against single diseases	Special investigations and examinations	3.79932
Fracture of vertebral column without mention of spinal cord lesion	Fracture of rib(s), sternum, larynx, and trachea	3.79815
Drug dependence	Poisoning by central nervous system stimulants	3.79672
Drug psychoses	Sedatives and hypnotics causing adverse effects in therapeutic use	3.79653
Fracture of metacarpal bone(s)	Fracture of ankle	3.79582
Regional enteritis	Anal fissure and fistula	3.79065
Fracture of rib(s), sternum, larynx, and trachea	Fracture of patella	3.79062
Pneumonia in infectious diseases classified elsewhere	Diseases of the oral soft tissues, excluding lesions specific for gingiva and tongue	3.7898
Fracture of one or more tarsal and metatarsal bones	Other motor vehicle traffic accident involving collision with another motor vehicle	3.78814
Injury to gastrointestinal tract	Certain early complications of trauma	3.78672
Other congenital anomalies of nervous system	Other congenital anomalies of limbs	3.7838
Fracture of other and unspecified parts of femur	Open wound of knee, leg [except thigh], and ankle	3.78286
Open wound of knee, leg [except thigh], and ankle	Other motor vehicle nontraffic accident involving collision with stationary object	3.7824
Fracture of tibia and fibula	Certain early complications of trauma	3.78213
Certain early complications of trauma	Assault by firearms and explosives	3.77843
Fracture of base of skull	Open wound of ear	3.77696
Open wound of ear	Other open wound of head	3.77678
Other congenital anomalies of circulatory system	Need for prophylactic vaccination and inoculation against combinations of diseases	3.77636
Fracture of rib(s), sternum, larynx, and trachea	Injury to liver	3.77491
Poisoning by analgesics, antipyretics, and antirheumatics	Accidental poisoning by other drugs acting on central and autonomic nervous systems	3.76986
Malignant neoplasm of tongue	Secondary and unspecified malignant neoplasm of lymph nodes	3.76646
Injury to heart and lung	Injury to blood vessels of thorax	3.76559
Injury to gastrointestinal tract	Injury to spleen	3.76533
Multiple sclerosis	Other disorders of bladder	3.76444
Fetus or newborn affected by maternal conditions which may be unrelated to present pregnancy	Disorders relating to short gestation and unspecified low birthweight	3.76414
Open wound of hip and thigh	Certain early complications of trauma	3.76374
Effects of reduced temperature	Housing, household, and economic circumstances	3.76308
Traumatic pneumothorax and hemothorax	Injury to spleen	3.75946
Injury to liver	Assault by cutting and piercing instrument	3.75539
Fracture of clavicle	Motor vehicle traffic accident involving collision with other vehicle	3.75324
Injury to heart and lung	Injury to liver	3.75251
Fracture of clavicle	Injury to heart and lung	3.7518
Congenital anomalies of the integument	Single liveborn	3.74834
Cholelithiasis	Other disorders of biliary tract	3.74391
Injury to other intra-abdominal organs	Certain early complications of trauma	3.74386
Acquired hemolytic anemias	Polyarteritis nodosa and allied conditions	3.74341
Injury to heart and lung	Injury to other and unspecified intrathoracic organs	3.74205
Injury to blood vessels of thorax	Certain early complications of trauma	3.74026
Other congenital anomalies of upper alimentary tract	Other congenital musculoskeletal anomalies	3.73979
Contusion of face, scalp, and neck except eye(s)	Contusion of eye and adnexa	3.73739
Other congenital anomalies of circulatory system	Infections specific to the perinatal period	3.72963
Fracture of scapula	Fall from or out of building or other structure	3.72847
Fracture of pelvis	Injury to other intra-abdominal organs	3.72572
Traumatic pneumothorax and hemothorax	Assault by firearms and explosives	3.72133
Lung involvement in conditions classified elsewhere	Diffuse diseases of connective tissue	3.71881
Affective psychoses	Poisoning by psychotropic agents	3.71813
Other congenital anomalies of limbs	Other congenital musculoskeletal anomalies	3.71749
Concussion	Other motor vehicle nontraffic accident involving collision with stationary object	3.71615
Portal vein thrombosis	Liver abscess and sequelae of chronic liver disease	3.71476
Arthropathy associated with infections	Osteomyelitis, periostitis, and other infections involving bone	3.71401
Other congenital anomalies of upper alimentary tract	Foreign body accidentally entering other orifice	3.71351
Disorders involving the immune mechanism	Bronchiectasis	3.71169
Accidental poisoning by analgesics, antipyretics, and antirheumatics	Accidental poisoning by other drugs	3.71039
Atopic dermatitis and related conditions	Other perinatal jaundice	3.70862
Malignant neoplasm of liver and intrahepatic bile ducts	Portal vein thrombosis	3.70485
Malignant melanoma of skin	Secondary and unspecified malignant neoplasm of lymph nodes	3.70433
Congenital anomalies of ear, face, and neck	Single liveborn	3.70022
Fracture of base of skull	Fight, brawl, and rape	3.69926
Certain early complications of trauma	Assault by cutting and piercing instrument	3.69768
Fracture of other and unspecified parts of femur	Other motor vehicle traffic accident involving collision with another motor vehicle	3.69641
Injury to heart and lung	Injury to kidney	3.694
Poisoning by central nervous system stimulants	Suicide and self-inflicted poisoning by solid or liquid substances	3.68749
Arthropathy associated with other disorders classified elsewhere	Osteomyelitis, periostitis, and other infections involving bone	3.68712
Injury to liver	Injury to blood vessels of abdomen and pelvis	3.68631
Other paralytic syndromes	Late effects of accidental injury	3.67983
Benign neoplasm of other endocrine glands and related structures	Disorders of parathyroid gland	3.67285
Specific delays in development	Epilepsy	3.67104
Malignant neoplasm of gallbladder and extrahepatic bile ducts	Other disorders of biliary tract	3.66803
Fracture of rib(s), sternum, larynx, and trachea	Dislocation of hip	3.66702
Other acute and subacute form of ischemic heart disease	Other forms of chronic ischemic heart disease	3.66317
Traumatic pneumothorax and hemothorax	Injury to kidney	3.6628
Personality disorders	Poisoning by psychotropic agents	3.65926
Other respiratory conditions of fetus and newborn	Fetal and neonatal hemorrhage	3.65922
Drug psychoses	Poisoning by drugs primarily affecting the autonomic nervous system	3.65618
Fracture of rib(s), sternum, larynx, and trachea	Fracture of pelvis	3.65498
Diseases of hard tissues of teeth	Diseases of pulp and periapical tissues	3.65353
Other respiratory conditions of fetus and newborn	Need for prophylactic vaccination and inoculation against combinations of diseases	3.65338
Injury to spleen	Injury to blood vessels of abdomen and pelvis	3.65333
Drug psychoses	Drug dependence	3.64902
Infections specific to the perinatal period	Need for prophylactic vaccination and inoculation against combinations of diseases	3.64771
Fracture of tibia and fibula	Open wound of elbow, forearm, and wrist	3.64755
Fracture of rib(s), sternum, larynx, and trachea	Injury to kidney	3.64723
Fracture of pelvis	Traumatic pneumothorax and hemothorax	3.64485
Single liveborn	Special investigations and examinations	3.64465
Other congenital anomalies of circulatory system	Fetal and neonatal hemorrhage	3.64402
Open wound of ocular adnexa	Motor vehicle traffic accident due to loss of control, without collision on the highway	3.64268
Drugs primarily affecting the autonomic nervous system causing adverse effects in therapeutic use	Agents primarily affecting the cardiovascular system causing adverse effects in therapeutic use	3.64206
Traumatic pneumothorax and hemothorax	Superficial injury of other, multiple, and unspecified sites	3.63915
Respiratory distress syndrome	Other respiratory conditions of fetus and newborn	3.63883
Fracture of one or more tarsal and metatarsal bones	Open wound of knee, leg [except thigh], and ankle	3.63785
Fracture of radius and ulna	Fracture of ankle	3.63725
Traumatic pneumothorax and hemothorax	Fall from or out of building or other structure	3.63631
Fracture of patella	Certain early complications of trauma	3.63377
Other and unqualified skull fractures	Assault by other and unspecified means	3.63155
Infections specific to the perinatal period	Other and ill-defined conditions originating in the perinatal period	3.63062
Injury to heart and lung	Injury to spleen	3.62609
Fracture of one or more tarsal and metatarsal bones	Fall from or out of building or other structure	3.62609
Personality disorders	Other psychosocial circumstances	3.6244
Other perinatal jaundice	Twin, mate liveborn	3.62384
Fracture of pelvis	Injury to kidney	3.62065
Fracture of radius and ulna	Injury to peripheral nerve(s) of shoulder girdle and upper limb	3.61995
Injury to kidney	Motor vehicle traffic accident due to loss of control, without collision on the highway	3.6154
Injury to spleen	Other motor vehicle traffic accident involving collision with another motor vehicle	3.61485
Fracture of ankle	Motor vehicle traffic accident involving collision with pedestrian	3.61323
Other organic psychotic conditions (chronic)	Other cerebral degenerations	3.61233
Fracture of face bones	Open wound of ear	3.61227
Fracture of scapula	Certain early complications of trauma	3.61194
Other congenital anomalies of circulatory system	Perinatal disorders of digestive system	3.61048
Health supervision of infant or child	Single liveborn	3.60898
Fracture of radius and ulna	Fracture of patella	3.60774
Pilonidal cyst	Special investigations and examinations	3.60758
Fracture of rib(s), sternum, larynx, and trachea	Fall from or out of building or other structure	3.60658
Fracture of neck of femur	Fall on same level from slipping, tripping, or stumbling	3.60598
Congenital anomalies of eye	Other and ill-defined conditions originating in the perinatal period	3.60487
Fracture of radius and ulna	Fracture of other and unspecified parts of femur	3.60285
Disorders relating to long gestation and high birthweight	Need for other prophylactic vaccination and inoculation against single diseases	3.60249
Fracture of radius and ulna	Fall from or out of building or other structure	3.60211
Fracture of vertebral column with spinal cord lesion	Fall on or from ladders or scaffolding	3.60133
Traumatic pneumothorax and hemothorax	Open wound of other and unspecified sites, except limbs	3.5988
Fracture of humerus	Fracture of radius and ulna	3.59856
Open wound of knee, leg [except thigh], and ankle	Other motor vehicle traffic accident involving collision with another motor vehicle	3.59673
Diabetes mellitus	Arthropathy associated with other disorders classified elsewhere	3.59438
Intracranial and intraspinal abscess	Arthropathy associated with infections	3.59418
Subarachnoid hemorrhage	Transcient cerebral ischemia	3.5922
Specific nonpsychotic mental disorders following organic brain damage	Cerebral laceration and contusion	3.58912
Injury to liver	Open wound of other and unspecified sites, except limbs	3.58864
Cellulitis and abscess of finger and toe	Osteomyelitis, periostitis, and other infections involving bone	3.58832
Superficial injury of hip, thigh, leg, and ankle	Other motor vehicle traffic accident involving collision on the highway	3.58822
Hemiplegia and hemiparesis	Symptoms involving head and neck	3.58677
Visual disturbances	Strabismus and other disorders of binocular eye movements	3.58298
Malignant neoplasm of liver and intrahepatic bile ducts	Chronic liver disease and cirrhosis	3.58169
Toxic effect of alcohol	Accidental poisoning by analgesics, antipyretics, and antirheumatics	3.57921
Other and unqualified skull fractures	Motor vehicle traffic accident involving collision with pedestrian	3.57704
Hereditary hemolytic anemias	Lung involvement in conditions classified elsewhere	3.57579
Inflammatory and toxic neuropathy	Arthropathy associated with other disorders classified elsewhere	3.57539
Other severe protein-calorie malnutrition	Body mass index	3.57298
Affective psychoses	Personality disorders	3.57104
Fracture of vertebral column with spinal cord lesion	Injury to blood vessels of head and neck	3.5702
Birth trauma	Need for other prophylactic vaccination and inoculation against single diseases	3.57002
Sprains and strains of other and unspecified parts of back	Other motor vehicle traffic accident involving collision with another motor vehicle	3.56805
Fracture of rib(s), sternum, larynx, and trachea	Other motor vehicle nontraffic accident involving collision with stationary object	3.56305
Nutritional marasmus	Pneumonia in infectious diseases classified elsewhere	3.56072
Injury to other and unspecified intrathoracic organs	Open wound of elbow, forearm, and wrist	3.5606
Fracture of other and unspecified parts of femur	Fracture of ankle	3.55999
Spondylosis and allied disorders	Other acquired deformity	3.55627
Other mycoses	Myeloid leukemia	3.55364
Diabetes mellitus	Inflammatory and toxic neuropathy	3.55018
Fracture of rib(s), sternum, larynx, and trachea	Other motor vehicle traffic accident involving collision with another motor vehicle	3.54894
Drug psychoses	Analgesics, antipyretics, and antirheumatics causing adverse effects in therapeutic use	3.54746
Atopic dermatitis and related conditions	Other and ill-defined conditions originating in the perinatal period	3.54541
Injury to blood vessels of head and neck	Certain early complications of trauma	3.54409
Late effects of other and unspecified external causes	Late effects of accidental injury	3.54062
Fracture of rib(s), sternum, larynx, and trachea	Motor vehicle traffic accident due to loss of control, without collision on the highway	3.54048
Acute glomerulonephritis	Osteomyelitis, periostitis, and other infections involving bone	3.53933
Intracranial injury of other and unspecified nature	Motor vehicle traffic accident due to loss of control, without collision on the highway	3.53865
Subarachnoid, subdural, and extradural hemorrhage, following injury	Other and unspecified fall	3.53787
Disorders of muscle, ligament, and fascia	Excessive cold	3.53746
Injury to liver	Injury to blood vessels of thorax	3.53612
Injury to liver	Suicide and self-inflicted injury by cutting and piercing instruments	3.53612
Open wound of elbow, forearm, and wrist	Certain early complications of trauma	3.53511
Fracture of vertebral column without mention of spinal cord lesion	Injury to heart and lung	3.53509
Other open wound of head	Contusion of eye and adnexa	3.53489
Congenital anomalies of the integument	Special investigations and examinations	3.53376
Facial nerve disorders	Strabismus and other disorders of binocular eye movements	3.53375
Viral hepatitis	Malignant neoplasm of liver and intrahepatic bile ducts	3.5336
Mononeuritis of lower limb	Other acquired deformities of limbs	3.52438
Fracture of pelvis	Fracture of one or more tarsal and metatarsal bones	3.52265
Traumatic pneumothorax and hemothorax	Open wound of shoulder and upper arm	3.52155
Fracture of scapula	Motor vehicle traffic accident involving collision with pedestrian	3.52145
Fracture of rib(s), sternum, larynx, and trachea	Certain early complications of trauma	3.52087
Fracture of humerus	Open wound of ocular adnexa	3.51815
Fracture of pelvis	Other motor vehicle traffic accident involving collision with another motor vehicle	3.51668
Injury to spleen	Other motor vehicle traffic accident involving collision on the highway	3.51598
Fracture of rib(s), sternum, larynx, and trachea	Injury to other intra-abdominal organs	3.51379
Intracranial injury of other and unspecified nature	Injury to heart and lung	3.51201
Fracture of base of skull	Contusion of eye and adnexa	3.50996
Injury to blood vessels of head and neck	Motor vehicle traffic accident due to loss of control, without collision on the highway	3.50878
Fracture of radius and ulna	Open wound of elbow, forearm, and wrist	3.50809
Visual disturbances	Disorders of optic nerve and visual pathways	3.50514
Fracture of scapula	Fall on or from ladders or scaffolding	3.50478
Malignant neoplasm of gallbladder and extrahepatic bile ducts	Other disorders of gallbladder	3.50351
Malignant neoplasm of pancreas	Secondary malignant neoplasm of respiratory and digestive systems	3.50323
Fracture of base of skull	Fall from or out of building or other structure	3.50209
Concussion	Other motor vehicle traffic accident involving collision with another motor vehicle	3.49904
Fracture of vertebral column without mention of spinal cord lesion	Traumatic pneumothorax and hemothorax	3.49824
Malignant neoplasm of small intestine, including duodenum	Secondary and unspecified malignant neoplasm of lymph nodes	3.4981
Other mycoses	Disorders involving the immune mechanism	3.49715
Meningitis of unspecified cause	Fetal and neonatal hemorrhage	3.49674
Respiratory distress syndrome	Other multiple, mates all liveborn	3.49216
Injury to heart and lung	Other motor vehicle traffic accident involving collision with another motor vehicle	3.49131
Fracture of base of skull	Assault by other and unspecified means	3.49077
Other open wound of head	Open wound of hand except finger(s) alone	3.48892
Open wound of finger(s)	Certain early complications of trauma	3.48848
Atopic dermatitis and related conditions	Other respiratory conditions of fetus and newborn	3.48751
Poisoning by analgesics, antipyretics, and antirheumatics	Accidental poisoning by other psychotropic agents	3.48239
Fracture of face bones	Fall from or out of building or other structure	3.48195
Other respiratory conditions of fetus and newborn	Twin, mate liveborn	3.47522
Hematological disorders of fetus and newborn	Need for prophylactic vaccination and inoculation against certain viral diseases	3.47138
Traumatic pneumothorax and hemothorax	Injury to other intra-abdominal organs	3.47109
Fracture of carpal bone(s)	Injury to liver	3.4708
Fracture of scapula	Fracture of ankle	3.46836
Fracture of one or more tarsal and metatarsal bones	Motor vehicle traffic accident due to loss of control, without collision on the highway	3.46751
Fracture of pelvis	Injury to heart and lung	3.46605
Fracture of other and unspecified parts of femur	Certain early complications of trauma	3.4622
Open wound of other and unspecified sites, except limbs	Certain early complications of trauma	3.46179
Fracture of radius and ulna	Fracture of tibia and fibula	3.46047
Herpes simplex	Pneumonia in infectious diseases classified elsewhere	3.4593
Liver abscess and sequelae of chronic liver disease	Other symptoms involving abdomen and pelvis	3.45854
Fracture of base of skull	Other noncollision motor vehicle traffic accident	3.45853
Fracture of pelvis	Fracture of patella	3.45788
Fracture of rib(s), sternum, larynx, and trachea	Concussion	3.4553
Curvature of spine	Other acquired deformity	3.45529
Fetal and neonatal hemorrhage	Other and ill-defined conditions originating in the perinatal period	3.455
Fracture of pelvis	Fracture of radius and ulna	3.45464
Fracture of ankle	Other motor vehicle traffic accident involving collision with another motor vehicle	3.45361
Injury to spleen	Motor vehicle traffic accident due to loss of control, without collision on the highway	3.45239
Fracture of pelvis	Fracture of humerus	3.45188
Open wound of finger(s)	Motor vehicle traffic accident due to loss of control, without collision on the highway	3.45158
Fracture of rib(s), sternum, larynx, and trachea	Injury to other and unspecified intrathoracic organs	3.45126
Contusion of face, scalp, and neck except eye(s)	Contusion of lower limb and of other and unspecified sites	3.44858
Congenital anomalies of the integument	Need for other prophylactic vaccination and inoculation against single diseases	3.44443
Acute and subacute endocarditis	Diseases of hard tissues of teeth	3.44404
Hypertensive heart and renal disease	Chronic renal failure	3.44393
Fracture of one or more tarsal and metatarsal bones	Concussion	3.4412
Fracture of rib(s), sternum, larynx, and trachea	Open wound of knee, leg [except thigh], and ankle	3.43803
Fracture of pelvis	Certain early complications of trauma	3.43786
Traumatic pneumothorax and hemothorax	Open wound of hip and thigh	3.43532
Congenital anomalies of the integument	Health supervision of infant or child	3.43502
Acute and subacute endocarditis	Arthropathy associated with infections	3.43406
Injury to gastrointestinal tract	Open wound of elbow, forearm, and wrist	3.43298
Fracture of one or more tarsal and metatarsal bones	Other motor vehicle traffic accident involving collision on the highway	3.43018
Spondylosis and allied disorders	Spinal cord injury without evidence of spinal bone injury	3.42926
Concussion	Other motor vehicle traffic accident involving collision on the highway	3.42864
Other specified intellectual disabilities	Epilepsy	3.42648
Other, multiple, and ill-defined dislocations	Certain early complications of trauma	3.4261
Injury to other and unspecified intrathoracic organs	Injury to other intra-abdominal organs	3.42534
Traumatic pneumothorax and hemothorax	Other motor vehicle nontraffic accident involving collision with stationary object	3.4234
Injury to heart and lung	Open wound of knee, leg [except thigh], and ankle	3.42311
Portal vein thrombosis	Chronic liver disease and cirrhosis	3.42208
Hemiplegia and hemiparesis	Occlusion of cerebral arteries	3.42128
Fracture of rib(s), sternum, larynx, and trachea	Other motor vehicle traffic accident involving collision on the highway	3.42123
Fracture of one or more tarsal and metatarsal bones	Injury to liver	3.42116
Inguinal hernia	Congenital anomalies of genital organs	3.42063
Injury to heart and lung	Open wound of finger(s)	3.41957
Injury to heart and lung	Other motor vehicle traffic accident involving collision on the highway	3.41773
Other open wound of head	Superficial injury of elbow, forearm, and wrist	3.4172
Other disorders of stomach and duodenum	Liver abscess and sequelae of chronic liver disease	3.41693
Late effects of other and unspecified external causes	Other procedures, without mention of misadventure at the time of procedure, as the cause of abnormal reaction of patient, or of later complication	3.41656
Fracture of neck of femur	Fracture of other and unspecified parts of femur	3.4155
Fracture of metacarpal bone(s)	Other motor vehicle traffic accident involving collision with another motor vehicle	3.41413
Fracture of radius and ulna	Injury to kidney	3.41156
Injury to blood vessels of upper extremity	Certain early complications of trauma	3.41045
Fracture of face bones	Fracture of metacarpal bone(s)	3.40978
Concussion	Injury to heart and lung	3.40808
Diseases of mitral and aortic valves	Diseases of other endocardial structures	3.40772
Personality disorders	Poisoning by analgesics, antipyretics, and antirheumatics	3.40664
Other disorders of intestine	Fistula involving female genital tract	3.4011
Other and unqualified skull fractures	Fracture of clavicle	3.40059
Injury to liver	Other motor vehicle traffic accident involving collision with another motor vehicle	3.40044
Intracranial injury of other and unspecified nature	Other motor vehicle traffic accident involving collision with another motor vehicle	3.40029
Fracture of humerus	Fracture of tibia and fibula	3.39997
Other respiratory conditions of fetus and newborn	Other multiple, mates all liveborn	3.39977
Fracture of vertebral column without mention of spinal cord lesion	Fracture of radius and ulna	3.39875
Alcoholic psychoses	Housing, household, and economic circumstances	3.39722
Dermatitis due to substances taken internally	Other and unspecified drugs and medicinal substances causing adverse effects in therapeutic use	3.39711
Anticonvulsants and anti-Parkinsonism drugs causing adverse effects in therapeutic use	Psychotropic agents causing adverse effects in therapeutic use	3.39492
Other retinal disorders	Need for prophylactic vaccination and inoculation against combinations of diseases	3.39429
Other, multiple, and ill-defined dislocations	Other motor vehicle traffic accident involving collision with another motor vehicle	3.39258
Fracture of one or more phalanges of foot	Traumatic pneumothorax and hemothorax	3.39225
Myeloid leukemia	Primarily systemic agents causing adverse effects in therapeutic use	3.3914
Fracture of other and unspecified parts of femur	Injury to heart and lung	3.3907
Traumatic pneumothorax and hemothorax	Open wound of hand except finger(s) alone	3.38892
Fracture of ankle	Injury to heart and lung	3.38763
Fracture of rib(s), sternum, larynx, and trachea	Fracture of ankle	3.38762
Malignant melanoma of skin	Secondary malignant neoplasm of other specified sites	3.38677
Concussion	Injury to liver	3.38575
Fracture of one or more tarsal and metatarsal bones	Traumatic pneumothorax and hemothorax	3.38562
Lymphosarcoma and reticulosarcoma	Primarily systemic agents causing adverse effects in therapeutic use	3.38418
Other bacterial diseases	Disorders of muscle, ligament, and fascia	3.38398
Fracture of vertebral column without mention of spinal cord lesion	Nontraffic accident involving other off-road motor vehicle	3.38181
Injury to heart and lung	Assault by firearms and explosives	3.37983
Fracture of ankle	Certain early complications of trauma	3.37758
Fracture of other and unspecified parts of femur	Injury to liver	3.37712
Diseases of pulp and periapical tissues	Diseases of the oral soft tissues, excluding lesions specific for gingiva and tongue	3.37577
Other personal history presenting hazards to health	Other specified personal exposures and history presenting hazards to health	3.37451
Other and ill-defined conditions originating in the perinatal period	Other multiple, mates all liveborn	3.3736
Contusion of face, scalp, and neck except eye(s)	Contusion of trunk	3.37318
Injury to heart and lung	Open wound of shoulder and upper arm	3.37263
Injury to liver	Other motor vehicle nontraffic accident involving collision with stationary object	3.37041
Pilonidal cyst	Observation and evaluation of newborns and infants for suspected condition not found	3.36929
Fracture of pelvis	Injury to pelvic organs	3.36701
Fracture of pelvis	Fracture of scapula	3.36668
Alcohol dependence syndrome	Housing, household, and economic circumstances	3.36501
Injury to kidney	Certain early complications of trauma	3.3639
Disorders of parathyroid gland	Vitamin D deficiency	3.36249
Disorders of the autonomic nervous system	Disorders of function of stomach	3.36084
Fetus or newborn affected by other complications of labor and delivery	Other respiratory conditions of fetus and newborn	3.36064
Fracture of ankle	Motor vehicle traffic accident due to loss of control, without collision on the highway	3.35853
Disorders relating to long gestation and high birthweight	Observation and evaluation of newborns and infants for suspected condition not found	3.35824
Varicose veins of other sites	Other symptoms involving abdomen and pelvis	3.3568
Myeloid leukemia	Disorders involving the immune mechanism	3.35658
Injury to heart and lung	Motor vehicle traffic accident of unspecified nature	3.35535
Other congenital anomalies of digestive system	Chromosomal anomalies	3.35463
Other congenital anomalies of circulatory system	Other perinatal jaundice	3.35461
Other mycoses	Abscess of lung and mediastinum	3.35421
Fracture of pelvis	Injury to spleen	3.35351
Nondependent abuse of drugs	Other persons seeking consultation without complaint or sickness	3.35033
Fracture of clavicle	Fracture of metacarpal bone(s)	3.34995
Fracture of vertebral column without mention of spinal cord lesion	Intracranial injury of other and unspecified nature	3.34882
Intracranial and intraspinal abscess	Other diseases of spinal cord	3.34786
Perinatal disorders of digestive system	Other and ill-defined conditions originating in the perinatal period	3.34632
Chronic liver disease and cirrhosis	Other symptoms involving abdomen and pelvis	3.34295
Other bacterial diseases	Other cellulitis and abscess	3.34256
Fracture of tibia and fibula	Motor vehicle traffic accident involving collision with other vehicle	3.34204
Respiratory distress syndrome	Twin, mate liveborn	3.34178
Injury to kidney	Other motor vehicle traffic accident involving collision on the highway	3.34037
Fracture of tibia and fibula	Other motor vehicle traffic accident involving collision with another motor vehicle	3.33767
Traumatic pneumothorax and hemothorax	Open wound of elbow, forearm, and wrist	3.33699
Congenital anomalies of eye	Hematological disorders of fetus and newborn	3.33584
Congenital anomalies of eye	Other respiratory conditions of fetus and newborn	3.33485
Fracture of pelvis	Fracture of ankle	3.3348
Open wound of elbow, forearm, and wrist	Motor vehicle traffic accident involving collision with pedestrian	3.33446
Injury to liver	Certain early complications of trauma	3.33398
Traumatic pneumothorax and hemothorax	Other motor vehicle traffic accident involving collision with another motor vehicle	3.33397
Fracture of face bones	Injury to blood vessels of head and neck	3.33312
Fracture of radius and ulna	Injury to heart and lung	3.33308
Fracture of vertebral column without mention of spinal cord lesion	Fall on or from ladders or scaffolding	3.33303
Malignant neoplasm of pancreas	Other disorders of biliary tract	3.3315
Family history of certain chronic disabling diseases	Family history of certain other specific conditions	3.33104
Injury to heart and lung	Injury to other intra-abdominal organs	3.33097
Fracture of one or more tarsal and metatarsal bones	Injury to heart and lung	3.32995
Injury to heart and lung	Open wound of elbow, forearm, and wrist	3.32995
Aplastic anemia	Diseases of the oral soft tissues, excluding lesions specific for gingiva and tongue	3.32778
Aplastic anemia	Primarily systemic agents causing adverse effects in therapeutic use	3.3276
Fracture of rib(s), sternum, larynx, and trachea	Superficial injury of other, multiple, and unspecified sites	3.32394
Fracture of metacarpal bone(s)	Certain early complications of trauma	3.32367
Inguinal hernia	Other disorders of male genital organs	3.32255
Injury to other intra-abdominal organs	Motor vehicle traffic accident due to loss of control, without collision on the highway	3.32184
Muscular dystrophies and other myopathies	Hormones and synthetic substitutes causing adverse effects in therapeutic use	3.31847
Other open wound of head	Superficial injury of trunk	3.31699
Personality disorders	Hyperkinetic syndrome of childhood	3.31592
Malignant neoplasm of trachea, bronchus, and lung	Secondary malignant neoplasm of other specified sites	3.31487
Suicide and self-inflicted poisoning by solid or liquid substances	Other psychosocial circumstances	3.31341
Fracture of radius and ulna	Other motor vehicle traffic accident involving collision with another motor vehicle	3.3129
Fracture of pelvis	Fracture of other and unspecified parts of femur	3.31262
Fracture of metacarpal bone(s)	Other open wound of head	3.31202
Other open wound of head	Other motor vehicle nontraffic accident involving collision with stationary object	3.3109
Other congenital anomalies of circulatory system	Disorders relating to short gestation and unspecified low birthweight	3.3064
Certain early complications of trauma	Other motor vehicle nontraffic accident involving collision with stationary object	3.30306
Secondary malignant neoplasm of respiratory and digestive systems	Malignant neoplasm without specification of site	3.30283
Hemiplegia and hemiparesis	Symptoms involving nervous and musculoskeletal systems	3.30171
Malignant neoplasm of connective and other soft tissue	Secondary malignant neoplasm of respiratory and digestive systems	3.30145
Fracture of pelvis	Concussion	3.29782
Injury to spleen	Open wound of knee, leg [except thigh], and ankle	3.2977
Other open wound of head	Motor vehicle traffic accident involving collision with pedestrian	3.29584
Fracture of vertebral column without mention of spinal cord lesion	Fracture of clavicle	3.2948
Affective psychoses	Poisoning by sedatives and hypnotics	3.2939
Fracture of vertebral column without mention of spinal cord lesion	Fall from or out of building or other structure	3.29345
Disorders relating to short gestation and unspecified low birthweight	Endocrine and metabolic disturbances specific to the fetus and newborn	3.29339
Open wound of hand except finger(s) alone	Certain early complications of trauma	3.29256
Fetus or newborn affected by maternal complications of pregnancy	Slow fetal growth and fetal malnutrition	3.28882
Other diseases due to viruses and Chlamydiae	Aplastic anemia	3.28749
Fracture of rib(s), sternum, larynx, and trachea	Open wound of hip and thigh	3.28723
Disorders relating to short gestation and unspecified low birthweight	Observation and evaluation of newborns and infants for suspected condition not found	3.28634
Fracture of metacarpal bone(s)	Injury to liver	3.28628
Affective psychoses	Poisoning by primarily systemic agents	3.28453
Other congenital anomalies of digestive system	Congenital anomalies of urinary system	3.2835
Injury to heart and lung	Open wound of ear	3.28295
Fracture of pelvis	Other, multiple, and ill-defined dislocations	3.28209
Fracture of vertebral column without mention of spinal cord lesion	Motor vehicle traffic accident due to loss of control, without collision on the highway	3.28163
Fracture of one or more tarsal and metatarsal bones	Injury to gastrointestinal tract	3.28111
Fracture of scapula	Open wound of elbow, forearm, and wrist	3.28074
Intracranial and intraspinal abscess	Other paralytic syndromes	3.27924
Observation and evaluation of newborns and infants for suspected condition not found	Elective surgery for purposes other than remedying health states	3.27919
Infantile cerebral palsy	Epilepsy	3.27725
Fracture of vertebral column without mention of spinal cord lesion	Motor vehicle traffic accident involving collision with pedestrian	3.27692
Multiple myeloma and immunoproliferative neoplasms	Disorders involving the immune mechanism	3.27587
Open wound of knee, leg [except thigh], and ankle	Other motor vehicle traffic accident involving collision on the highway	3.27568
Fracture of pelvis	Open wound of other and unspecified sites, except limbs	3.27543
Fracture of ankle	Other motor vehicle traffic accident involving collision on the highway	3.27416
Fracture of vertebral column without mention of spinal cord lesion	Other motor vehicle traffic accident involving collision with another motor vehicle	3.27287
Hemiplegia and hemiparesis	Facial nerve disorders	3.2717
Fracture of rib(s), sternum, larynx, and trachea	Sprains and strains of knee and leg	3.27123
Fracture of radius and ulna	Open wound of ocular adnexa	3.27111
Poisoning by psychotropic agents	Accidental poisoning by analgesics, antipyretics, and antirheumatics	3.26866
Fracture of one or more tarsal and metatarsal bones	Injury to other intra-abdominal organs	3.26687
Fetus or newborn affected by maternal complications of pregnancy	Other perinatal jaundice	3.26648
Other and ill-defined conditions originating in the perinatal period	Need for prophylactic vaccination and inoculation against bacterial diseases	3.26569
Fracture of humerus	Fracture of one or more tarsal and metatarsal bones	3.26449
Myeloid leukemia	Aplastic anemia	3.26348
Traumatic pneumothorax and hemothorax	Motor vehicle traffic accident due to loss of control, without collision on the highway	3.26333
Slow fetal growth and fetal malnutrition	Other perinatal jaundice	3.2632
Fracture of tibia and fibula	Injury to gastrointestinal tract	3.26225
Fracture of face bones	Fracture of radius and ulna	3.26183
Fracture of other and unspecified parts of femur	Other motor vehicle nontraffic accident involving collision with stationary object	3.25942
Hemiplegia and hemiparesis	Intracerebral hemorrhage	3.25733
Injury to liver	Open wound of knee, leg [except thigh], and ankle	3.25719
Spondylosis and allied disorders	Curvature of spine	3.25661
Suicide and self-inflicted poisoning by solid or liquid substances	Suicide and self-inflicted injury by cutting and piercing instruments	3.25557
Other congenital anomalies of nervous system	Fetal and neonatal hemorrhage	3.25499
Injury to heart and lung	Open wound of other and unspecified sites, except limbs	3.25476
Fracture of metacarpal bone(s)	Injury to spleen	3.25376
Conditions involving the integument and temperature regulation of fetus and newborn	Need for other prophylactic vaccination and inoculation against single diseases	3.25291
Benign neoplasm of other endocrine glands and related structures	Disorders of adrenal glands	3.25272
Open wound of hand except finger(s) alone	Motor vehicle traffic accident due to loss of control, without collision on the highway	3.25073
Contusion of lower limb and of other and unspecified sites	Motor vehicle traffic accident involving collision with pedestrian	3.25008
Traumatic pneumothorax and hemothorax	Injury to blood vessels of head and neck	3.24947
Fracture of vault of skull	Fracture of scapula	3.24874
Other congenital anomalies of circulatory system	Other and ill-defined conditions originating in the perinatal period	3.24839
Other open wound of head	Assault by other and unspecified means	3.24815
Fracture of vertebral column without mention of spinal cord lesion	Fracture of tibia and fibula	3.24813
Fetus or newborn affected by maternal complications of pregnancy	Respiratory distress syndrome	3.24521
Inflammatory and toxic neuropathy	Other retinal disorders	3.24444
Secondary and unspecified malignant neoplasm of lymph nodes	Secondary malignant neoplasm of respiratory and digestive systems	3.2444
Other and unspecified disorders of metabolism	Intracerebral hemorrhage	3.24238
Fracture of scapula	Fracture of tibia and fibula	3.24113
Other retinal disorders	Arthropathy associated with other disorders classified elsewhere	3.24028
Fracture of metacarpal bone(s)	Fracture of tibia and fibula	3.23744
Bacterial meningitis	Pneumococcal pneumonia [Streptococcus pneumoniae pneumonia]	3.2366
Fracture of one or more phalanges of hand	Other motor vehicle traffic accident involving collision with another motor vehicle	3.23581
Fetus or newborn affected by maternal conditions which may be unrelated to present pregnancy	Other multiple, mates all liveborn	3.23199
Fracture of radius and ulna	Injury to liver	3.23147
Open wound of knee, leg [except thigh], and ankle	Motor vehicle traffic accident due to loss of control, without collision on the highway	3.23141
Acute laryngitis and tracheitis	Other diseases of upper respiratory tract	3.23132
Fracture of rib(s), sternum, larynx, and trachea	Fracture of radius and ulna	3.23038
Other disorders of ear	Fracture of base of skull	3.22955
Malignant neoplasm of stomach	Secondary and unspecified malignant neoplasm of lymph nodes	3.22593
Fracture of face bones	Struck accidentally by falling object	3.22475
Other and unspecified infectious and parasitic diseases	Disorders of the pituitary gland and its hypothalamic control	3.22357
Atopic dermatitis and related conditions	Infections specific to the perinatal period	3.22338
Slow fetal growth and fetal malnutrition	Endocrine and metabolic disturbances specific to the fetus and newborn	3.22281
Injury to other and unspecified intrathoracic organs	Other motor vehicle traffic accident involving collision with another motor vehicle	3.22281
Bulbus cordis anomalies and anomalies of cardiac septal closure	Chromosomal anomalies	3.22074
Other congenital anomalies of circulatory system	Other respiratory conditions of fetus and newborn	3.21984
Endocrine and metabolic disturbances specific to the fetus and newborn	Hematological disorders of fetus and newborn	3.21901
Fracture of rib(s), sternum, larynx, and trachea	Fracture of tibia and fibula	3.21866
Diseases of white blood cells	Primarily systemic agents causing adverse effects in therapeutic use	3.21418
Lymphoid leukemia	Acquired hemolytic anemias	3.21415
Secondary and unspecified malignant neoplasm of lymph nodes	Secondary malignant neoplasm of other specified sites	3.21402
Observation and evaluation of newborns and infants for suspected condition not found	Special investigations and examinations	3.21368
Fracture of vertebral column without mention of spinal cord lesion	Fracture of one or more tarsal and metatarsal bones	3.21246
Acute appendicitis	Intestinal obstruction without mention of hernia	3.21164
Malignant neoplasm of bladder	Hydronephrosis	3.21152
Fracture of radius and ulna	Concussion	3.21094
Fracture of other and unspecified parts of femur	Other motor vehicle traffic accident involving collision on the highway	3.21028
Certain early complications of trauma	Other motor vehicle traffic accident involving collision with another motor vehicle	3.20986
Other and unqualified skull fractures	Fall on or from stairs or steps	3.20938
Meningitis of unspecified cause	Infections specific to the perinatal period	3.20933
Personality disorders	Housing, household, and economic circumstances	3.20924
Septicemia	Infections of kidney	3.20846
Other and ill-defined conditions originating in the perinatal period	Twin, mate liveborn	3.2083
Fracture of one or more tarsal and metatarsal bones	Certain early complications of trauma	3.20735
Drug dependence	Poisoning by analgesics, antipyretics, and antirheumatics	3.20611
Secondary malignant neoplasm of other specified sites	Other diseases of spinal cord	3.20588
Hemolytic disease of fetus or newborn, due to isoimmunization	Single liveborn	3.20336
Fracture of vertebral column without mention of spinal cord lesion	Injury to other and unspecified intrathoracic organs	3.20153
Occlusion of cerebral arteries	Septic arterial embolism	3.20153
Fracture of radius and ulna	Fall on or from ladders or scaffolding	3.2002
Traumatic pneumothorax and hemothorax	Motor vehicle traffic accident involving collision with pedestrian	3.19969
Injury to kidney	Other motor vehicle traffic accident involving collision with another motor vehicle	3.19685
Other perinatal jaundice	Observation and evaluation of newborns and infants for suspected condition not found	3.19343
Fracture of rib(s), sternum, larynx, and trachea	Motor vehicle traffic accident involving collision with pedestrian	3.19158
Traumatic pneumothorax and hemothorax	Open wound of neck	3.19148
Fetus or newborn affected by complications of placenta, cord, and membranes	Other and ill-defined conditions originating in the perinatal period	3.19096
Fracture of radius and ulna	Open wound of knee, leg [except thigh], and ankle	3.19079
Angina pectoris	Other forms of chronic ischemic heart disease	3.19072
Drug dependence	Accidental poisoning by tranquilizers	3.18801
Other, multiple, and ill-defined dislocations	Injury to other intra-abdominal organs	3.1869
Fracture of humerus	Fracture of ankle	3.18529
Fracture of base of skull	Other open wound of head	3.18405
Fracture of base of skull	Struck accidentally by falling object	3.18396
Fracture of face bones	Other motor vehicle nontraffic accident involving collision with stationary object	3.18368
Fracture of face bones	Multiple fractures involving skull or face with other bones	3.18348
Traumatic pneumothorax and hemothorax	Other motor vehicle traffic accident involving collision on the highway	3.18313
Nutritional marasmus	Intestinal malabsorption	3.18222
Inflammatory disease of ovary, fallopian tube, pelvic cellular tissue, and peritoneum	Persons encountering health services for specific procedures, not carried out	3.18053
Fracture of rib(s), sternum, larynx, and trachea	Intracranial injury of other and unspecified nature	3.17987
Fetus or newborn affected by complications of placenta, cord, and membranes	Hematological disorders of fetus and newborn	3.17975
Peritonitis	Other disorders of intestine	3.1797
Fetus or newborn affected by other complications of labor and delivery	Birth trauma	3.17866
Hemorrhoids	Diverticula of intestine	3.17713
Other congenital anomalies of circulatory system	Congenital anomalies of respiratory system	3.17659
Fracture of vertebral column without mention of spinal cord lesion	Injury to kidney	3.17606
Intervertebral disc disorders	Osteomyelitis, periostitis, and other infections involving bone	3.17468
Other disorders of peritoneum	Inflammatory disease of ovary, fallopian tube, pelvic cellular tissue, and peritoneum	3.17385
Fracture of tibia and fibula	Concussion	3.17362
Fracture of vertebral column with spinal cord lesion	Fall from or out of building or other structure	3.17322
Injury to other intra-abdominal organs	Open wound of elbow, forearm, and wrist	3.17205
Injury to blood vessels of abdomen and pelvis	Motor vehicle traffic accident involving collision with pedestrian	3.17098
Fracture of pelvis	Fracture of clavicle	3.17011
Fracture of tibia and fibula	Injury to heart and lung	3.16825
Other congenital anomalies of nervous system	Slow fetal growth and fetal malnutrition	3.16734
Cerebral laceration and contusion	Fight, brawl, and rape	3.16583
Other respiratory conditions of fetus and newborn	Observation and evaluation of newborns and infants for suspected condition not found	3.16495
Fracture of radius and ulna	Motor vehicle traffic accident of unspecified nature	3.16379
Fracture of radius and ulna	Other motor vehicle nontraffic accident involving collision with stationary object	3.16363
Open wound of ear	Other motor vehicle traffic accident involving collision with another motor vehicle	3.16232
Traumatic pneumothorax and hemothorax	Injury to blood vessels of abdomen and pelvis	3.16119
Diseases of other endocardial structures	Other rheumatic heart disease	3.15884
Chronic renal failure	Disorders resulting from impaired renal function	3.15806
Other respiratory conditions of fetus and newborn	Perinatal disorders of digestive system	3.15757
Inguinal hernia	Perinatal disorders of digestive system	3.15756
Other congenital anomalies of circulatory system	Need for prophylactic vaccination and inoculation against bacterial diseases	3.15691
Fetus or newborn affected by complications of placenta, cord, and membranes	Other respiratory conditions of fetus and newborn	3.1566
Benign neoplasm of other parts of digestive system	Hemorrhoids	3.15638
Drug dependence	Accidental poisoning by analgesics, antipyretics, and antirheumatics	3.1541
Fracture of tibia and fibula	Injury to kidney	3.15407
Fracture of vertebral column without mention of spinal cord lesion	Other motor vehicle traffic accident involving collision on the highway	3.15289
Injury to liver	Motor vehicle traffic accident involving collision with other vehicle	3.15255
Other diseases due to viruses and Chlamydiae	Myeloid leukemia	3.15049
Fracture of vertebral column with spinal cord lesion	Certain early complications of trauma	3.1504
Septicemia	Other bacterial diseases	3.15003
Fracture of rib(s), sternum, larynx, and trachea	Fracture of one or more tarsal and metatarsal bones	3.14999
Poisoning by psychotropic agents	Accidental poisoning by other drugs	3.14877
Need for prophylactic vaccination and inoculation against combinations of diseases	Twin, mate liveborn	3.14635
Concussion	Other open wound of head	3.14622
Other open wound of head	Open wound of knee, leg [except thigh], and ankle	3.14577
Other perinatal jaundice	Endocrine and metabolic disturbances specific to the fetus and newborn	3.14569
Fracture of base of skull	Fracture of metacarpal bone(s)	3.14549
Fracture of scapula	Other motor vehicle traffic accident involving collision with another motor vehicle	3.14476
Fracture of vertebral column without mention of spinal cord lesion	Fall on or from stairs or steps	3.14459
Malignant neoplasm of small intestine, including duodenum	Secondary malignant neoplasm of respiratory and digestive systems	3.14378
Fracture of humerus	Open wound of elbow, forearm, and wrist	3.14333
Alcohol dependence syndrome	Excessive cold	3.14307
Fracture of rib(s), sternum, larynx, and trachea	Contusion of trunk	3.14267
Carrier or suspected carrier of infectious diseases	Infection with drug-resistant microorganisms	3.13982
Malignant neoplasm of liver and intrahepatic bile ducts	Varicose veins of other sites	3.1388
Fetus or newborn affected by other complications of labor and delivery	Disorders relating to short gestation and unspecified low birthweight	3.13707
Mononeuritis of upper limb and mononeuritis multiplex	Fracture of radius and ulna	3.13618
Encephalitis, myelitis, and encephalomyelitis	Diffuse diseases of connective tissue	3.13465
Fracture of vertebral column without mention of spinal cord lesion	Other, multiple, and ill-defined dislocations	3.13375
Poisoning by analgesics, antipyretics, and antirheumatics	Poisoning by sedatives and hypnotics	3.13326
Aplastic anemia	Pneumonia in infectious diseases classified elsewhere	3.13107
Fracture of clavicle	Motor vehicle traffic accident of unspecified nature	3.12941
Malignant neoplasm of trachea, bronchus, and lung	Secondary and unspecified malignant neoplasm of lymph nodes	3.12839
Intervertebral disc disorders	Other acquired deformity	3.12698
Fracture of base of skull	Fracture of clavicle	3.12591
Cholelithiasis	Diseases of pancreas	3.12568
Congenital anomalies of the integument	Observation and evaluation of newborns and infants for suspected condition not found	3.12424
Fracture of radius and ulna	Injury to other and unspecified intrathoracic organs	3.12274
Acute pulmonary heart disease	Other venous embolism and thrombosis	3.12221
Fracture of rib(s), sternum, larynx, and trachea	Fall on or from ladders or scaffolding	3.1181
Fracture of vertebral column with spinal cord lesion	Concussion	3.11768
Fetus or newborn affected by other complications of labor and delivery	Fetal and neonatal hemorrhage	3.11734
Fracture of patella	Injury to heart and lung	3.11682
Respiratory distress syndrome	Need for prophylactic vaccination and inoculation against certain viral diseases	3.11601
Fracture of rib(s), sternum, larynx, and trachea	Dislocation of shoulder	3.11464
Other respiratory conditions of fetus and newborn	Need for prophylactic vaccination and inoculation against certain viral diseases	3.11332
Fracture of other and unspecified parts of femur	Open wound of elbow, forearm, and wrist	3.11128
Injury to liver	Motor vehicle traffic accident due to loss of control, without collision on the highway	3.11123
Traumatic pneumothorax and hemothorax	Injury to gastrointestinal tract	3.11066
Fracture of clavicle	Fall from or out of building or other structure	3.10983
Dermatitis due to substances taken internally	Water, mineral, and uric acid metabolism drugs causing adverse effects in therapeutic use	3.10853
Fracture of vertebral column without mention of spinal cord lesion	Injury to other intra-abdominal organs	3.10477
Viral hepatitis	Chronic liver disease and cirrhosis	3.10453
Fracture of radius and ulna	Other, multiple, and ill-defined dislocations	3.10273
Injury to heart and lung	Fall from or out of building or other structure	3.10113
Housing, household, and economic circumstances	Other psychosocial circumstances	3.09949
Fracture of pelvis	Injury to gastrointestinal tract	3.09941
Malignant neoplasm of prostate	Malignant neoplasm of bladder	3.09889
Inguinal hernia	Infections specific to the perinatal period	3.09791
Hypertensive renal disease	Disorders resulting from impaired renal function	3.0979
Malignant neoplasm of liver and intrahepatic bile ducts	Liver abscess and sequelae of chronic liver disease	3.09787
Portal vein thrombosis	Other symptoms involving abdomen and pelvis	3.09774
Infections specific to the perinatal period	Endocrine and metabolic disturbances specific to the fetus and newborn	3.09735
Affective psychoses	Poisoning by analgesics, antipyretics, and antirheumatics	3.09692
Fracture of scapula	Fracture of humerus	3.09393
Fracture of radius and ulna	Injury to other intra-abdominal organs	3.09277
Fracture of one or more phalanges of hand	Motor vehicle traffic accident due to loss of control, without collision on the highway	3.09163
Polyarteritis nodosa and allied conditions	Polymyalgia rheumatica	3.09155
Fracture of clavicle	Motor vehicle traffic accident due to loss of control, without collision on the highway	3.09051
Coagulation defects	Acute and subacute necrosis of liver	3.09047
Acute and subacute necrosis of liver	Poisoning by analgesics, antipyretics, and antirheumatics	3.08936
Fetus or newborn affected by complications of placenta, cord, and membranes	Single liveborn	3.08859
Nondependent abuse of drugs	Poisoning by other central nervous system depressants and anesthetics	3.08845
Fracture of vertebral column without mention of spinal cord lesion	Fracture of patella	3.08467
Injury to blood vessels of thorax	Other motor vehicle traffic accident involving collision with another motor vehicle	3.08368
Endocrine and metabolic disturbances specific to the fetus and newborn	Need for prophylactic vaccination and inoculation against certain viral diseases	3.08324
Respiratory distress syndrome	Need for prophylactic vaccination and inoculation against bacterial diseases	3.0823
Fetus or newborn affected by maternal complications of pregnancy	Twin, mate liveborn	3.08201
Other open wound of head	Motor vehicle traffic accident involving collision with other vehicle	3.08058
Slow fetal growth and fetal malnutrition	Conditions involving the integument and temperature regulation of fetus and newborn	3.07661
Subarachnoid, subdural, and extradural hemorrhage, following injury	Fall on same level from slipping, tripping, or stumbling	3.0766
Nondependent abuse of drugs	Poisoning by central nervous system stimulants	3.07653
Fetus or newborn affected by complications of placenta, cord, and membranes	Slow fetal growth and fetal malnutrition	3.07651
Acute and subacute necrosis of liver	Accidental poisoning by analgesics, antipyretics, and antirheumatics	3.07496
Pain, not elsewhere classified	Other and unspecified disorders of back	3.07475
Fracture of radius and ulna	Motor vehicle traffic accident involving collision with pedestrian	3.07361
Fracture of clavicle	Injury to kidney	3.07305
Fracture of vertebral column with spinal cord lesion	Motor vehicle traffic accident of unspecified nature	3.07213
Fracture of base of skull	Motor vehicle traffic accident involving collision with other vehicle	3.07061
Drug dependence	Accidental poisoning by other psychotropic agents	3.06824
Intracranial injury of other and unspecified nature	Other open wound of head	3.06745
Fracture of vertebral column without mention of spinal cord lesion	Fracture of humerus	3.06607
Concussion	Injury to spleen	3.06448
Fracture of other and unspecified parts of femur	Motor vehicle traffic accident due to loss of control, without collision on the highway	3.06045
Atopic dermatitis and related conditions	Need for other prophylactic vaccination and inoculation against single diseases	3.05843
Injury to liver	Fall from or out of building or other structure	3.05756
Other congenital anomalies of nervous system	Chromosomal anomalies	3.05738
Viral hepatitis	Drug dependence	3.05719
Fracture of base of skull	Fracture of scapula	3.05669
Fracture of pelvis	Open wound of knee, leg [except thigh], and ankle	3.05666
Fracture of base of skull	Fall on or from ladders or scaffolding	3.05614
Fetus or newborn affected by maternal conditions which may be unrelated to present pregnancy	Single liveborn	3.05593
Fracture of humerus	Injury to kidney	3.0544
Fracture of clavicle	Open wound of elbow, forearm, and wrist	3.05355
Fracture of neck of femur	Fracture of tibia and fibula	3.05266
Malignant neoplasm of rectum, rectosigmoid junction, and anus	Persons encountering health services for specific procedures, not carried out	3.05186
Inguinal hernia	Hematological disorders of fetus and newborn	3.05145
Other and unspecified disorders of metabolism	Other and ill-defined cerebrovascular disease	3.05144
Injury to liver	Motor vehicle traffic accident of unspecified nature	3.0505
Fracture of vertebral column without mention of spinal cord lesion	Open wound of ocular adnexa	3.04943
Other extrapyramidal disease and abnormal movement disorders	Psychotropic agents causing adverse effects in therapeutic use	3.04853
Human immunodeficiency virus [HIV] disease	Lymphosarcoma and reticulosarcoma	3.04685
Nutritional marasmus	Disorders of plasma protein metabolism	3.0467
Dislocation of shoulder	Traumatic pneumothorax and hemothorax	3.04572
Fracture of vertebral column without mention of spinal cord lesion	Injury to blood vessels of abdomen and pelvis	3.04571
Fracture of scapula	Injury to other intra-abdominal organs	3.04454
Fracture of tibia and fibula	Traumatic pneumothorax and hemothorax	3.04349
Chronic ulcer of skin	Osteomyelitis, periostitis, and other infections involving bone	3.04327
Fracture of scapula	Injury to kidney	3.04282
Fetus or newborn affected by maternal complications of pregnancy	Other respiratory conditions of fetus and newborn	3.04237
Fracture of base of skull	Fall on or from stairs or steps	3.04151
Fracture of base of skull	Motor vehicle traffic accident involving collision with pedestrian	3.04064
Multiple fractures involving skull or face with other bones	Fracture of vertebral column without mention of spinal cord lesion	3.04018
Fracture of vertebral column without mention of spinal cord lesion	Concussion	3.03967
Fracture of radius and ulna	Injury to spleen	3.03927
Fetus or newborn affected by maternal conditions which may be unrelated to present pregnancy	Observation and evaluation of newborns and infants for suspected condition not found	3.03749
Myeloid leukemia	Other alveolar and parietoalveolar pneumopathy	3.03603
Fracture of radius and ulna	Traumatic pneumothorax and hemothorax	3.03537
Meningitis of unspecified cause	Hematological disorders of fetus and newborn	3.03464
Other, multiple, and ill-defined dislocations	Injury to heart and lung	3.03356
Fracture of scapula	Fracture of radius and ulna	3.0335
Benign neoplasm of other endocrine glands and related structures	Disorders of the pituitary gland and its hypothalamic control	3.03264
Disorders of muscle, ligament, and fascia	Effects of reduced temperature	3.03234
Other paralytic syndromes	Other disorders of bladder	3.03173
Drug psychoses	Accidental poisoning by tranquilizers	3.03155
Open wound of elbow, forearm, and wrist	Other motor vehicle traffic accident involving collision with another motor vehicle	3.03083
Fracture of pelvis	Fall from or out of building or other structure	3.03055
Fracture of neck of femur	Fracture of one or more tarsal and metatarsal bones	3.02812
Disorders relating to short gestation and unspecified low birthweight	Need for prophylactic vaccination and inoculation against certain viral diseases	3.02806
Fracture of rib(s), sternum, larynx, and trachea	Fracture of one or more phalanges of hand	3.02757
Arthropathy associated with infections	Antibiotics causing adverse effects in therapeutic use	3.02659
Other retinal disorders	Nephritis and nephropathy, not specified as acute or chronic	3.02584
Fracture of pelvis	Dislocation of shoulder	3.02519
Injury to spleen	Fall from or out of building or other structure	3.02516
Fetus or newborn affected by maternal conditions which may be unrelated to present pregnancy	Other and ill-defined conditions originating in the perinatal period	3.02277
Fracture of metacarpal bone(s)	Traumatic pneumothorax and hemothorax	3.02249
Other disorders of stomach and duodenum	Chronic liver disease and cirrhosis	3.02191
Respiratory conditions due to other and unspecified external agents	Other procedures, without mention of misadventure at the time of procedure, as the cause of abnormal reaction of patient, or of later complication	3.02189
Fracture of metacarpal bone(s)	Injury to heart and lung	3.02132
Human immunodeficiency virus [HIV] disease	Pneumonia in infectious diseases classified elsewhere	3.02123
Fracture of ankle	Injury to other intra-abdominal organs	3.02012
Intrauterine hypoxia and birth asphyxia	Single liveborn	3.0193
Injury to spleen	Motor vehicle traffic accident of unspecified nature	3.01787
Slow fetal growth and fetal malnutrition	Other and ill-defined conditions originating in the perinatal period	3.01759
Fracture of rib(s), sternum, larynx, and trachea	Open wound of elbow, forearm, and wrist	3.01581
Injury to gastrointestinal tract	Motor vehicle traffic accident due to loss of control, without collision on the highway	3.01528
Fracture of pelvis	Injury to liver	3.01505
Traumatic pneumothorax and hemothorax	Suicide and self-inflicted injury by cutting and piercing instruments	3.01387
Diseases of the oral soft tissues, excluding lesions specific for gingiva and tongue	Dermatitis due to substances taken internally	3.01292
Atopic dermatitis and related conditions	Other multiple, mates all liveborn	3.01264
Other congenital anomalies of limbs	Fetal and neonatal hemorrhage	3.01108
Fracture of vault of skull	Other open wound of head	3.01095
Other congenital anomalies of nervous system	Hematological disorders of fetus and newborn	3.01058
Fracture of vault of skull	Motor vehicle traffic accident involving collision with pedestrian	3.01006
Fracture of clavicle	Other motor vehicle traffic accident involving collision with another motor vehicle	3.00987
Viral hepatitis	Asymptomatic human immunodeficiency virus [HIV] infection status	3.00948
Septicemia	Septic arterial embolism	3.00887
Other and ill-defined conditions originating in the perinatal period	Need for prophylactic vaccination and inoculation against certain viral diseases	3.00857
Fracture of other and unspecified parts of femur	Motor vehicle traffic accident involving collision with pedestrian	3.00853
Fracture of humerus	Fracture of neck of femur	3.00812
Cerebral laceration and contusion	Motor vehicle traffic accident involving collision with pedestrian	3.00763
Drug dependence	Poisoning by psychotropic agents	3.00698
Other bacterial pneumonia	Infection with drug-resistant microorganisms	3.00552
Certain early complications of trauma	Motor vehicle traffic accident involving collision with pedestrian	3.00431
Fracture of rib(s), sternum, larynx, and trachea	Fracture of metacarpal bone(s)	3.00353
Traumatic pneumothorax and hemothorax	Open wound of knee, leg [except thigh], and ankle	3.00195
Fracture of pelvis	Other motor vehicle nontraffic accident involving collision with stationary object	3.00109
Other and unspecified intracranial hemorrhage following injury	Other motor vehicle traffic accident involving collision on the highway	3.00057
Human immunodeficiency virus [HIV] disease	Viral hepatitis	2.99984
Fracture of rib(s), sternum, larynx, and trachea	Struck accidentally by falling object	2.99976
Blindness and low vision	Hearing loss	2.99508
Fetus or newborn affected by other complications of labor and delivery	Other perinatal jaundice	2.99428
Other respiratory conditions of fetus and newborn	Endocrine and metabolic disturbances specific to the fetus and newborn	2.99257
Infections of kidney	Certain adverse effects, not elsewhere classified	2.99186
Other mycoses	Empyema	2.99119
Fracture of ankle	Injury to liver	2.98855
Fracture of vertebral column without mention of spinal cord lesion	Injury to spleen	2.98852
Injury to gastrointestinal tract	Other motor vehicle traffic accident involving collision with another motor vehicle	2.98815
Fetal and neonatal hemorrhage	Endocrine and metabolic disturbances specific to the fetus and newborn	2.98577
Fracture of radius and ulna	Certain early complications of trauma	2.98514
Congenital anomalies of ear, face, and neck	Other and ill-defined conditions originating in the perinatal period	2.98508
Fetus or newborn affected by maternal conditions which may be unrelated to present pregnancy	Other perinatal jaundice	2.9838
Malignant neoplasm of kidney and other and unspecified urinary organs	Secondary malignant neoplasm of other specified sites	2.98303
Conditions involving the integument and temperature regulation of fetus and newborn	Single liveborn	2.98285
Adjustment reaction	Suicide and self-inflicted poisoning by solid or liquid substances	2.98116
Endocrine and metabolic disturbances specific to the fetus and newborn	Single liveborn	2.97911
Symptoms involving cardiovascular system	Certain adverse effects, not elsewhere classified	2.97836
Congenital anomalies of urinary system	Other congenital anomalies of limbs	2.97834
Inflammatory and toxic neuropathy	Nephritis and nephropathy, not specified as acute or chronic	2.97819
Other open wound of head	Motor vehicle traffic accident due to loss of control, without collision on the highway	2.97805
Concussion	Traumatic pneumothorax and hemothorax	2.97721
Conditions involving the integument and temperature regulation of fetus and newborn	Health supervision of infant or child	2.97717
Malignant neoplasm of ovary and other uterine adnexa	Secondary malignant neoplasm of other specified sites	2.97581
Multiple fractures involving skull or face with other bones	Traumatic pneumothorax and hemothorax	2.97552
Fracture of humerus	Other motor vehicle traffic accident involving collision with another motor vehicle	2.97466
Injury to liver	Open wound of elbow, forearm, and wrist	2.97381
Fetus or newborn affected by maternal complications of pregnancy	Observation and evaluation of newborns and infants for suspected condition not found	2.9738
Congenital anomalies of genital organs	Slow fetal growth and fetal malnutrition	2.9731
Viral hepatitis	Varicose veins of other sites	2.97296
Atopic dermatitis and related conditions	Observation and evaluation of newborns and infants for suspected condition not found	2.97186
Malignant neoplasm of rectum, rectosigmoid junction, and anus	Secondary and unspecified malignant neoplasm of lymph nodes	2.97111
Fracture of pelvis	Contusion of trunk	2.96765
Fracture of rib(s), sternum, larynx, and trachea	Open wound of ear	2.96651
Fracture of rib(s), sternum, larynx, and trachea	Superficial injury of elbow, forearm, and wrist	2.96573
Other open wound of head	Struck accidentally by falling object	2.96571
Injury to heart and lung	Assault by cutting and piercing instrument	2.96542
Fracture of base of skull	Superficial injury of hip, thigh, leg, and ankle	2.96464
Alcohol dependence syndrome	Chronic liver disease and cirrhosis	2.96453
Fracture of rib(s), sternum, larynx, and trachea	Motor vehicle traffic accident involving collision with other vehicle	2.96383
Postinflammatory pulmonary fibrosis	Other alveolar and parietoalveolar pneumopathy	2.96283
Concussion	Injury to other intra-abdominal organs	2.96142
Congenital anomalies of the integument	Conditions involving the integument and temperature regulation of fetus and newborn	2.96139
Malignant neoplasm of pancreas	Other disorders of gallbladder	2.9594
Septic arterial embolism	Certain adverse effects, not elsewhere classified	2.95894
Fracture of clavicle	Injury to spleen	2.95856
Disorders of optic nerve and visual pathways	Fracture of face bones	2.95628
Schizophrenic psychoses	Mild intellectual disabilities	2.95627
Open wound of knee, leg [except thigh], and ankle	Certain early complications of trauma	2.95524
Anterior horn cell disease	Artificial opening status	2.95357
Fracture of tibia and fibula	Other open wound of head	2.95347
Benign neoplasm of other parts of digestive system	Diverticula of intestine	2.95337
Fracture of tibia and fibula	Contusion of lower limb and of other and unspecified sites	2.95107
Fracture of vault of skull	Fracture of clavicle	2.95097
Fracture of vertebral column without mention of spinal cord lesion	Certain early complications of trauma	2.94708
Fracture of clavicle	Other motor vehicle traffic accident involving collision on the highway	2.94705
Fracture of clavicle	Motor vehicle traffic accident involving collision with pedestrian	2.94617
Injury to other and unspecified intrathoracic organs	Motor vehicle traffic accident due to loss of control, without collision on the highway	2.94608
Unspecified intellectual disabilities	Epilepsy	2.94472
Affective psychoses	Accidental poisoning by other psychotropic agents	2.94308
Septicemia	Symptoms involving cardiovascular system	2.9409
Diffuse diseases of connective tissue	Nonspecific abnormal histological and immunological findings	2.94037
Injury to spleen	Certain early complications of trauma	2.93872
Subarachnoid, subdural, and extradural hemorrhage, following injury	Fall on or from stairs or steps	2.93869
Fracture of radius and ulna	Motor vehicle traffic accident due to loss of control, without collision on the highway	2.93693
Intervertebral disc disorders	Curvature of spine	2.93354
Injury to other intra-abdominal organs	Other motor vehicle traffic accident involving collision on the highway	2.93219
Fracture of face bones	Fracture of one or more phalanges of hand	2.93216
Certain early complications of trauma	Motor vehicle traffic accident involving collision with other vehicle	2.93181
Affective psychoses	Poisoning by central nervous system stimulants	2.9318
Symptoms involving nervous and musculoskeletal systems	Symptoms involving head and neck	2.93143
Endocrine and metabolic disturbances specific to the fetus and newborn	Other and ill-defined conditions originating in the perinatal period	2.93125
Concussion	Motor vehicle traffic accident due to loss of control, without collision on the highway	2.93096
Fracture of clavicle	Certain early complications of trauma	2.92785
Birth trauma	Observation and evaluation of newborns and infants for suspected condition not found	2.92607
Malignant neoplasm of ovary and other uterine adnexa	Other symptoms involving abdomen and pelvis	2.9251
Traumatic pneumothorax and hemothorax	Open wound of ear	2.92419
Traumatic pneumothorax and hemothorax	Open wound of finger(s)	2.92419
Other open wound of head	Pedal cycle accident	2.91998
Open wound of knee, leg [except thigh], and ankle	Contusion of face, scalp, and neck except eye(s)	2.9195
Fracture of vault of skull	Fall on or from stairs or steps	2.91841
Fracture of rib(s), sternum, larynx, and trachea	Injury to blood vessels of head and neck	2.91826
Fetus or newborn affected by other complications of labor and delivery	Single liveborn	2.91814
Hematological disorders of fetus and newborn	Twin, mate liveborn	2.91711
Disorders of muscle, ligament, and fascia	Poisoning by central nervous system stimulants	2.91674
Malignant neoplasm of connective and other soft tissue	Secondary malignant neoplasm of other specified sites	2.91673
Endocrine and metabolic disturbances specific to the fetus and newborn	Perinatal disorders of digestive system	2.91669
Endocrine and metabolic disturbances specific to the fetus and newborn	Conditions involving the integument and temperature regulation of fetus and newborn	2.91607
Spondylosis and allied disorders	Intervertebral disc disorders	2.91577
Fracture of vertebral column without mention of spinal cord lesion	Open wound of ear	2.91466
Fetus or newborn affected by maternal complications of pregnancy	Other and ill-defined conditions originating in the perinatal period	2.91464
Fracture of scapula	Injury to spleen	2.91335
Other open wound of head	Injury to blood vessels of head and neck	2.91257
Other conditions of brain	Suicide and self-inflicted injury by hanging, strangulation, and suffocation	2.91256
Respiratory distress syndrome	Observation and evaluation of newborns and infants for suspected condition not found	2.91099
Postinflammatory pulmonary fibrosis	Lung involvement in conditions classified elsewhere	2.90807
Fracture of rib(s), sternum, larynx, and trachea	Fracture of other and unspecified parts of femur	2.90735
Mononeuritis of upper limb and mononeuritis multiplex	Certain early complications of trauma	2.9051
Diseases of white blood cells	Diseases of the oral soft tissues, excluding lesions specific for gingiva and tongue	2.90493
Malignant neoplasm of retroperitoneum and peritoneum	Secondary malignant neoplasm of respiratory and digestive systems	2.90413
Congenital anomalies of genital organs	Infections specific to the perinatal period	2.90294
Fracture of vertebral column with spinal cord lesion	Traumatic pneumothorax and hemothorax	2.90259
Fracture of face bones	Other and unqualified skull fractures	2.90109
Adjustment reaction	Other psychosocial circumstances	2.90078
Fracture of clavicle	Fracture of radius and ulna	2.9003
Conditions involving the integument and temperature regulation of fetus and newborn	Other and ill-defined conditions originating in the perinatal period	2.89945
Other and unqualified skull fractures	Fracture of vertebral column without mention of spinal cord lesion	2.89912
Fracture of clavicle	Open wound of knee, leg [except thigh], and ankle	2.89905
Fracture of vertebral column without mention of spinal cord lesion	Fracture of one or more phalanges of hand	2.899
Malignant neoplasm of retroperitoneum and peritoneum	Secondary malignant neoplasm of other specified sites	2.89895
Fracture of ankle	Injury to gastrointestinal tract	2.89846
Fracture of rib(s), sternum, larynx, and trachea	Injury to gastrointestinal tract	2.89808
Fracture of ankle	Traumatic pneumothorax and hemothorax	2.89789
Fracture of tibia and fibula	Motor vehicle traffic accident of unspecified nature	2.89596
Fetus or newborn affected by complications of placenta, cord, and membranes	Fetal and neonatal hemorrhage	2.89585
Health supervision of infant or child	Observation and evaluation of newborns and infants for suspected condition not found	2.89464
Fracture of tibia and fibula	Open wound of knee, leg [except thigh], and ankle	2.89432
Slow fetal growth and fetal malnutrition	Twin, mate liveborn	2.89294
Fracture of base of skull	Fracture of one or more phalanges of hand	2.89123
Secondary malignant neoplasm of other specified sites	Malignant neoplasm without specification of site	2.89069
Intracranial and intraspinal abscess	Acute and subacute endocarditis	2.89044
Lymphosarcoma and reticulosarcoma	Aplastic anemia	2.89028
Fracture of other and unspecified parts of femur	Injury to kidney	2.88994
Drug dependence	Poisoning by agents primarily affecting the cardiovascular system	2.88941
Malignant neoplasm of kidney and other and unspecified urinary organs	Secondary malignant neoplasm of respiratory and digestive systems	2.8893
Fetus or newborn affected by other complications of labor and delivery	Respiratory distress syndrome	2.88879
Fracture of clavicle	Injury to liver	2.88872
Fracture of face bones	Other motor vehicle traffic accident involving collision on the highway	2.88871
Fracture of ankle	Injury to spleen	2.88792
Complications of medical care, not elsewhere classified	Other procedures, without mention of misadventure at the time of procedure, as the cause of abnormal reaction of patient, or of later complication	2.88655
Other cerebral degenerations	Subarachnoid hemorrhage	2.88507
Fracture of face bones	Motor vehicle traffic accident involving collision with pedestrian	2.88505
Drug dependence	Poisoning by sedatives and hypnotics	2.88481
Gastric ulcer	Duodenal ulcer	2.88369
Other congenital anomalies of circulatory system	Other multiple, mates all liveborn	2.88123
Other paralytic syndromes	Fracture of vertebral column with spinal cord lesion	2.88085
Fracture of vertebral column with spinal cord lesion	Other fall from one level to another	2.88085
Fracture of vertebral column without mention of spinal cord lesion	Open wound of hip and thigh	2.8798
Injury to heart and lung	Motor vehicle traffic accident involving collision with pedestrian	2.87926
Diseases of mitral valve	Diseases of other endocardial structures	2.87794
Malignant neoplasm of female breast	Secondary malignant neoplasm of other specified sites	2.8778
Fracture of other and unspecified parts of femur	Traumatic pneumothorax and hemothorax	2.87642
Other open wound of head	Fight, brawl, and rape	2.87628
Traumatic pneumothorax and hemothorax	Motor vehicle traffic accident involving collision with other vehicle	2.87569
Affective psychoses	Hyperkinetic syndrome of childhood	2.8746
Spinal cord injury without evidence of spinal bone injury	Fall on or from stairs or steps	2.87404
Fracture of face bones	Dislocation of shoulder	2.87392
Cerebral laceration and contusion	Other open wound of head	2.87341
Hydronephrosis	Other disorders of kidney and ureter	2.87249
Malignant neoplasm of pancreas	Secondary and unspecified malignant neoplasm of lymph nodes	2.8724
Fracture of face bones	Fracture of tibia and fibula	2.8714
Regional enteritis	Intestinal malabsorption	2.87039
Fetus or newborn affected by maternal conditions which may be unrelated to present pregnancy	Other respiratory conditions of fetus and newborn	2.87035
Malignant neoplasm of esophagus	Secondary and unspecified malignant neoplasm of lymph nodes	2.86909
Fracture of rib(s), sternum, larynx, and trachea	Fracture of humerus	2.86904
Fracture of rib(s), sternum, larynx, and trachea	Motor vehicle traffic accident of unspecified nature	2.86817
Congenital anomalies of urinary system	Other and unspecified congenital anomalies	2.86536
Fracture of pelvis	Other motor vehicle traffic accident involving collision on the highway	2.86476
Observation and evaluation of newborns and infants for suspected condition not found	Twin, mate liveborn	2.8646
Conditions involving the integument and temperature regulation of fetus and newborn	Observation and evaluation of newborns and infants for suspected condition not found	2.86453
Intracranial injury of other and unspecified nature	Traumatic pneumothorax and hemothorax	2.86371
Fracture of pelvis	Injury to other and unspecified intrathoracic organs	2.86229
Fetus or newborn affected by maternal conditions which may be unrelated to present pregnancy	Fetal and neonatal hemorrhage	2.86201
Injury to liver	Motor vehicle traffic accident involving collision with pedestrian	2.86106
Human immunodeficiency virus [HIV] disease	Other anti-infectives causing adverse effects in therapeutic use	2.85964
Fracture of vertebral column without mention of spinal cord lesion	Injury to liver	2.85873
Fracture of radius and ulna	Injury to gastrointestinal tract	2.85834
Fracture of vertebral column with spinal cord lesion	Fracture of rib(s), sternum, larynx, and trachea	2.85827
Fracture of face bones	Fracture of humerus	2.85797
Fracture of clavicle	Fracture of tibia and fibula	2.85572
Congenital anomalies of respiratory system	Infections specific to the perinatal period	2.85568
Congenital anomalies of urinary system	Chromosomal anomalies	2.85451
Affective psychoses	Poisoning by agents primarily affecting the cardiovascular system	2.85344
Fracture of scapula	Motor vehicle traffic accident due to loss of control, without collision on the highway	2.8532
Other severe protein-calorie malnutrition	Peritonitis	2.85239
Respiratory distress syndrome	Endocrine and metabolic disturbances specific to the fetus and newborn	2.85209
Ovarian dysfunction	Obesity and other hyperalimentation	2.85126
Other open wound of head	Open wound of finger(s)	2.85
Fracture of neck of femur	Other and unspecified fall	2.84862
Gastric ulcer	Analgesics, antipyretics, and antirheumatics causing adverse effects in therapeutic use	2.84834
Other congenital anomalies of nervous system	Other and ill-defined conditions originating in the perinatal period	2.84757
Fracture of face bones	Motor vehicle traffic accident due to loss of control, without collision on the highway	2.84578
Other diseases of lung	Inhalation and ingestion of other object causing obstruction of respiratory tract or suffocation	2.84556
Other paralytic syndromes	Osteomyelitis, periostitis, and other infections involving bone	2.84477
Fracture of humerus	Traumatic pneumothorax and hemothorax	2.84414
Affective psychoses	Accidental poisoning by tranquilizers	2.84194
Subarachnoid, subdural, and extradural hemorrhage, following injury	Other and unspecified intracranial hemorrhage following injury	2.84166
Multiple myeloma and immunoproliferative neoplasms	Other diseases of spinal cord	2.8399
Fetus or newborn affected by complications of placenta, cord, and membranes	Endocrine and metabolic disturbances specific to the fetus and newborn	2.83985
Fracture of rib(s), sternum, larynx, and trachea	Fracture of carpal bone(s)	2.83933
Fracture of vertebral column without mention of spinal cord lesion	Other motor vehicle nontraffic accident involving collision with stationary object	2.83827
Fracture of vertebral column without mention of spinal cord lesion	Fracture of ankle	2.83748
Thiamine and niacin deficiency states	Nondependent abuse of drugs	2.83709
Fracture of humerus	Injury to other intra-abdominal organs	2.83575
Other disorders of gallbladder	Other disorders of biliary tract	2.83558
Other respiratory conditions of fetus and newborn	Single liveborn	2.83307
Fracture of tibia and fibula	Other motor vehicle traffic accident involving collision on the highway	2.83218
Injury to heart and lung	Injury to gastrointestinal tract	2.83175
Other disorders of peritoneum	Noninflammatory disorders of ovary, fallopian tube, and broad ligament	2.83012
Injury to heart and lung	Other open wound of head	2.82899
Other congenital anomalies of circulatory system	Endocrine and metabolic disturbances specific to the fetus and newborn	2.82844
Fracture of radius and ulna	Other open wound of head	2.82825
Affective psychoses	Suicide and self-inflicted injury by cutting and piercing instruments	2.82712
Noninflammatory disorders of ovary, fallopian tube, and broad ligament	Persons encountering health services for specific procedures, not carried out	2.82349
Other complications of procedures, not elsewhere classified	Other and unspecified misadventures during medical care	2.82273
Fracture of tibia and fibula	Injury to liver	2.82227
Pilonidal cyst	Need for other prophylactic vaccination and inoculation against single diseases	2.82202
Subarachnoid, subdural, and extradural hemorrhage, following injury	Striking against or struck accidentally by objects or persons	2.82011
Inguinal hernia	Other congenital anomalies of circulatory system	2.81849
Fetus or newborn affected by other complications of labor and delivery	Observation and evaluation of newborns and infants for suspected condition not found	2.81758
Pneumonia in infectious diseases classified elsewhere	Hormones and synthetic substitutes causing adverse effects in therapeutic use	2.81648
Other perinatal jaundice	Need for prophylactic vaccination and inoculation against certain viral diseases	2.81523
Slow fetal growth and fetal malnutrition	Other respiratory conditions of fetus and newborn	2.81461
Epilepsy	Anticonvulsants and anti-Parkinsonism drugs causing adverse effects in therapeutic use	2.81223
Fracture of carpal bone(s)	Other open wound of head	2.81147
Myeloid leukemia	Diseases of white blood cells	2.81112
Portal vein thrombosis	Other disorders of stomach and duodenum	2.81005
Disorders relating to short gestation and unspecified low birthweight	Intrauterine hypoxia and birth asphyxia	2.8082
Fracture of vertebral column without mention of spinal cord lesion	Fracture of other and unspecified parts of femur	2.8082
Congenital anomalies of respiratory system	Hematological disorders of fetus and newborn	2.80798
Fracture of face bones	Injury to heart and lung	2.80634
Open wound of ocular adnexa	Other motor vehicle traffic accident involving collision with another motor vehicle	2.80501
Affective psychoses	Other psychosocial circumstances	2.80477
Fracture of neck of femur	Fracture of ankle	2.80292
Cleft palate and cleft lip	Other and ill-defined conditions originating in the perinatal period	2.80151
Contusion of face, scalp, and neck except eye(s)	Fall on or from stairs or steps	2.80108
Fracture of pelvis	Motor vehicle traffic accident involving collision with other vehicle	2.80079
Malignant neoplasm of esophagus	Other specified personal exposures and history presenting hazards to health	2.80078
Cerebral laceration and contusion	Motor vehicle traffic accident involving collision with other vehicle	2.80078
Cerebral laceration and contusion	Other motor vehicle nontraffic accident involving collision with stationary object	2.80078
Fracture of pelvis	Motor vehicle traffic accident due to loss of control, without collision on the highway	2.79941
Disorders of muscle, ligament, and fascia	Other acquired deformities of limbs	2.79771
Injury to other intra-abdominal organs	Other motor vehicle traffic accident involving collision with another motor vehicle	2.7977
Other and unspecified intracranial hemorrhage following injury	Fall on or from stairs or steps	2.79548
Other respiratory conditions of fetus and newborn	Need for other prophylactic vaccination and inoculation against single diseases	2.79527
Fracture of pelvis	Fall on or from ladders or scaffolding	2.79508
Cellulitis and abscess of finger and toe	Chronic ulcer of skin	2.7942
Other bacterial diseases	Acute renal failure	2.79336
Fracture of vertebral column without mention of spinal cord lesion	Open wound of knee, leg [except thigh], and ankle	2.79321
Bulbus cordis anomalies and anomalies of cardiac septal closure	Other congenital anomalies of circulatory system	2.79118
Hematological disorders of fetus and newborn	Other multiple, mates all liveborn	2.7904
Fracture of humerus	Injury to gastrointestinal tract	2.7903
Contusion of trunk	Other motor vehicle traffic accident involving collision with another motor vehicle	2.7902
Malignant melanoma of skin	Secondary malignant neoplasm of respiratory and digestive systems	2.78968
Drug psychoses	Poisoning by central nervous system stimulants	2.78836
Injury to heart and lung	Injury to blood vessels of abdomen and pelvis	2.7864
Cerebral laceration and contusion	Fall on or from stairs or steps	2.78552
Viral hepatitis	Liver abscess and sequelae of chronic liver disease	2.78521
Malignant neoplasm of ovary and other uterine adnexa	Secondary and unspecified malignant neoplasm of lymph nodes	2.78381
Fracture of vertebral column with spinal cord lesion	Injury to heart and lung	2.78314
Fracture of face bones	Fracture of scapula	2.78211
Disorders relating to long gestation and high birthweight	Elective surgery for purposes other than remedying health states	2.78171
Mild intellectual disabilities	Epilepsy	2.78162
Fracture of scapula	Injury to liver	2.7812
Benign neoplasm of ovary	Surgical operation and other surgical procedures as the cause of abnormal reaction of patient, or of later complication, without mention of misadventure at the time of operation	2.78105
Fracture of pelvis	Motor vehicle traffic accident of unspecified nature	2.78048
Cerebral laceration and contusion	Contusion of lower limb and of other and unspecified sites	2.78027
Malignant neoplasm of gallbladder and extrahepatic bile ducts	Secondary malignant neoplasm of respiratory and digestive systems	2.77878
Disorders involving the immune mechanism	Aplastic anemia	2.77848
Fracture of rib(s), sternum, larynx, and trachea	Injury to blood vessels of abdomen and pelvis	2.77825
Fracture of vertebral column with spinal cord lesion	Fall on or from stairs or steps	2.77823
Injury to heart and lung	Open wound of ocular adnexa	2.77735
Other and ill-defined conditions originating in the perinatal period	Observation and evaluation of newborns and infants for suspected condition not found	2.77452
Certain congenital musculoskeletal deformities	Single liveborn	2.77451
Other aneurysm	Arterial embolism and thrombosis	2.77445
Osteomyelitis, periostitis, and other infections involving bone	Late effects of injuries to the nervous system	2.77297
Pneumococcal pneumonia [Streptococcus pneumoniae pneumonia]	Empyema	2.77209
Fracture of neck of femur	Open wound of knee, leg [except thigh], and ankle	2.77101
Fracture of vault of skull	Fracture of radius and ulna	2.77067
Poisoning by analgesics, antipyretics, and antirheumatics	Other psychosocial circumstances	2.77028
Concussion	Certain early complications of trauma	2.76969
Family history of malignant neoplasm	Family history of certain other specific conditions	2.76942
Diabetes mellitus	Nephritis and nephropathy, not specified as acute or chronic	2.76869
Osteomyelitis, periostitis, and other infections involving bone	Late effects of accidental injury	2.76845
Other disorders of bone and cartilage	Late effects of musculoskeletal and connective tissue injuries	2.76669
Multiple fractures involving skull or face with other bones	Other open wound of head	2.76293
Fracture of face bones	Other motor vehicle traffic accident involving collision with another motor vehicle	2.76292
Fracture of vertebral column without mention of spinal cord lesion	Contusion of trunk	2.76248
Other, multiple, and ill-defined dislocations	Other open wound of head	2.76216
Fracture of vertebral column without mention of spinal cord lesion	Injury to blood vessels of thorax	2.76196
Hemolytic disease of fetus or newborn, due to isoimmunization	Need for other prophylactic vaccination and inoculation against single diseases	2.76154
Intestinal obstruction without mention of hernia	Inflammatory disease of ovary, fallopian tube, pelvic cellular tissue, and peritoneum	2.76141
Fetus or newborn affected by other complications of labor and delivery	Other and ill-defined conditions originating in the perinatal period	2.7599
Fracture of other and unspecified parts of femur	Injury to gastrointestinal tract	2.75842
Malignant neoplasm of colon	Secondary and unspecified malignant neoplasm of lymph nodes	2.75828
Fracture of vertebral column without mention of spinal cord lesion	Injury to gastrointestinal tract	2.75362
Fracture of base of skull	Other motor vehicle nontraffic accident involving collision with stationary object	2.75192
Acute and subacute necrosis of liver	Liver abscess and sequelae of chronic liver disease	2.75182
Congenital anomalies of eye	Other perinatal jaundice	2.75034
Drug psychoses	Accidental poisoning by other psychotropic agents	2.74569
Other hernia of abdominal cavity, with obstruction, but without mention of gangrene	Other disorders of peritoneum	2.74561
Slow fetal growth and fetal malnutrition	Hematological disorders of fetus and newborn	2.74387
Other disorders of peritoneum	Other disorders of intestine	2.74381
Atopic dermatitis and related conditions	Respiratory distress syndrome	2.74369
Epilepsy	Late effects of injuries to the nervous system	2.74264
Contusion of trunk	Other fall from one level to another	2.74205
Fracture of vertebral column without mention of spinal cord lesion	Other open wound of head	2.74139
Fracture of vertebral column with spinal cord lesion	Fracture of scapula	2.73926
Adjustment reaction	Hyperkinetic syndrome of childhood	2.73871
Fracture of face bones	Fracture of ankle	2.73815
Fracture of face bones	Pedal cycle accident	2.73781
Other open wound of head	Other motor vehicle traffic accident involving collision with another motor vehicle	2.73486
Other congenital anomalies of circulatory system	Chromosomal anomalies	2.73426
Intrauterine hypoxia and birth asphyxia	Observation and evaluation of newborns and infants for suspected condition not found	2.7341
Other hernia of abdominal cavity, with obstruction, but without mention of gangrene	Vascular insufficiency of intestine	2.73386
Contusion of eye and adnexa	Other and unspecified fall	2.73377
Analgesics, antipyretics, and antirheumatics causing adverse effects in therapeutic use	Psychotropic agents causing adverse effects in therapeutic use	2.73344
Multiple sclerosis	Other paralytic syndromes	2.73223
Nondependent abuse of drugs	Accidental poisoning by alcohol, not elsewhere classified	2.7317
Fracture of face bones	Motor vehicle traffic accident of unspecified nature	2.73047
Fracture of vertebral column without mention of spinal cord lesion	Injury to blood vessels of head and neck	2.73019
Atherosclerosis	Cellulitis and abscess of finger and toe	2.72886
Other malignant neoplasm of lymphoid and histiocytic tissue	Primarily systemic agents causing adverse effects in therapeutic use	2.7274
Secondary malignant neoplasm of respiratory and digestive systems	Bronchopneumonia, organism unspecified	2.72578
Other and unqualified skull fractures	Injury to heart and lung	2.72512
Malignant neoplasm of colon	Intestinal obstruction without mention of hernia	2.72473
Fracture of base of skull	Fracture of radius and ulna	2.7244
Schizophrenic psychoses	Personality disorders	2.72416
Other congenital anomalies of nervous system	Other congenital anomalies of circulatory system	2.72318
Fracture of face bones	Fracture of one or more tarsal and metatarsal bones	2.7229
Subarachnoid, subdural, and extradural hemorrhage, following injury	Other fall from one level to another	2.72158
Secondary malignant neoplasm of other specified sites	Bronchopneumonia, organism unspecified	2.72057
Disorders relating to short gestation and unspecified low birthweight	Conditions involving the integument and temperature regulation of fetus and newborn	2.72023
Other diseases of upper respiratory tract	Other diseases of respiratory system	2.71993
Fetus or newborn affected by maternal conditions which may be unrelated to present pregnancy	Respiratory distress syndrome	2.71923
Visual disturbances	Symptoms involving nervous and musculoskeletal systems	2.71865
Fracture of one or more phalanges of hand	Traumatic pneumothorax and hemothorax	2.71816
Other respiratory conditions of fetus and newborn	Need for prophylactic vaccination and inoculation against bacterial diseases	2.71737
Other congenital anomalies of circulatory system	Certain congenital musculoskeletal deformities	2.71706
Fracture of rib(s), sternum, larynx, and trachea	Pedal cycle accident	2.71666
Congenital anomalies of eye	Single liveborn	2.71417
Antibiotics causing adverse effects in therapeutic use	Other anti-infectives causing adverse effects in therapeutic use	2.71411
Nondependent abuse of drugs	Accidental poisoning by other psychotropic agents	2.71349
Fracture of one or more tarsal and metatarsal bones	Injury to spleen	2.71256
Alcohol dependence syndrome	Varicose veins of other sites	2.71235
Glaucoma	Cataract	2.71178
Atopic dermatitis and related conditions	Endocrine and metabolic disturbances specific to the fetus and newborn	2.71173
Duodenal ulcer	Analgesics, antipyretics, and antirheumatics causing adverse effects in therapeutic use	2.71045
Fracture of face bones	Fracture of vertebral column without mention of spinal cord lesion	2.70939
Peritonitis	Other disorders of peritoneum	2.70857
Certain early complications of trauma	Other motor vehicle traffic accident involving collision on the highway	2.70821
Other conditions of brain	Effects of other external causes	2.70811
Fetus or newborn affected by complications of placenta, cord, and membranes	Disorders relating to short gestation and unspecified low birthweight	2.70809
Empyema	Pleurisy	2.70779
Fracture of pelvis	Fracture of neck of femur	2.70544
Subarachnoid, subdural, and extradural hemorrhage, following injury	Pedal cycle accident	2.70476
Other retinal disorders	Hematological disorders of fetus and newborn	2.70378
Fracture of vertebral column without mention of spinal cord lesion	Motor vehicle traffic accident involving collision with other vehicle	2.70371
Congenital anomalies of respiratory system	Single liveborn	2.70353
Fracture of face bones	Motor vehicle traffic accident involving collision with other vehicle	2.70267
Adjustment reaction	Poisoning by psychotropic agents	2.70209
Alcohol dependence syndrome	Liver abscess and sequelae of chronic liver disease	2.70188
Fracture of humerus	Certain early complications of trauma	2.70149
Obesity and other hyperalimentation	Organic sleep disorders	2.70062
Fracture of pelvis	Fracture of metacarpal bone(s)	2.69946
Fracture of tibia and fibula	Injury to other intra-abdominal organs	2.69909
Observation and evaluation of newborns and infants for suspected condition not found	Other multiple, mates all liveborn	2.69706
Fracture of base of skull	Pedal cycle accident	2.69688
Malignant neoplasm of female breast	Secondary malignant neoplasm of respiratory and digestive systems	2.69043
Fracture of base of skull	Motor vehicle traffic accident of unspecified nature	2.68912
Disorders resulting from impaired renal function	Psychotropic agents causing adverse effects in therapeutic use	2.68701
Injury to gastrointestinal tract	Motor vehicle traffic accident involving collision with pedestrian	2.6857
Fracture of base of skull	Injury to heart and lung	2.68568
Other disorders of eye	Symptoms involving nervous and musculoskeletal systems	2.68522
Hyperkinetic syndrome of childhood	Suicide and self-inflicted poisoning by solid or liquid substances	2.68124
Arthropathy associated with infections	Other and unspecified disorder of joint	2.68116
Fracture of vertebral column with spinal cord lesion	Other motor vehicle traffic accident involving collision with another motor vehicle	2.68025
Traumatic pneumothorax and hemothorax	Fall on or from ladders or scaffolding	2.67901
Fracture of rib(s), sternum, larynx, and trachea	Open wound of ocular adnexa	2.67893
Gastric ulcer	Gastritis and duodenitis	2.678
Other diseases due to viruses and Chlamydiae	Disorders of the pituitary gland and its hypothalamic control	2.67585
Infections specific to the perinatal period	Hemolytic disease of fetus or newborn, due to isoimmunization	2.67534
Fetal and neonatal hemorrhage	Conditions involving the integument and temperature regulation of fetus and newborn	2.67516
Congenital anomalies of respiratory system	Respiratory distress syndrome	2.67476
Other diseases of respiratory system	Inhalation and ingestion of other object causing obstruction of respiratory tract or suffocation	2.67192
Perinatal disorders of digestive system	Twin, mate liveborn	2.67185
Vascular insufficiency of intestine	Peritonitis	2.6718
Other disorders of liver	Poisoning by analgesics, antipyretics, and antirheumatics	2.67132
Fetus or newborn affected by complications of placenta, cord, and membranes	Other perinatal jaundice	2.67091
Fracture of other and unspecified parts of femur	Injury to spleen	2.67077
Fracture of base of skull	Fracture of vertebral column without mention of spinal cord lesion	2.66984
Fracture of clavicle	Fall on or from stairs or steps	2.66845
Other diseases of blood and blood-forming organs	Portal vein thrombosis	2.66727
Need for other prophylactic vaccination and inoculation against single diseases	Need for prophylactic vaccination and inoculation against combinations of diseases	2.66618
Fracture of scapula	Other open wound of head	2.66598
Bacterial meningitis	Subarachnoid hemorrhage	2.66419
Carrier or suspected carrier of infectious diseases	Attention to artificial openings	2.66069
Adjustment reaction	Poisoning by analgesics, antipyretics, and antirheumatics	2.66058
Injury to heart and lung	Contusion of trunk	2.66048
Congenital anomalies of genital organs	Hematological disorders of fetus and newborn	2.65849
Slow fetal growth and fetal malnutrition	Perinatal disorders of digestive system	2.65828
Fracture of vertebral column without mention of spinal cord lesion	Dislocation of shoulder	2.65459
Malignant neoplasm of ovary and other uterine adnexa	Intestinal obstruction without mention of hernia	2.65455
Other open wound of head	Assault by cutting and piercing instrument	2.65341
Hypertensive heart and renal disease	Heart failure	2.6534
Other perinatal jaundice	Single liveborn	2.6525
Fracture of face bones	Fracture of rib(s), sternum, larynx, and trachea	2.65151
Other open wound of head	Open wound of neck	2.65023
Alcohol dependence syndrome	Toxic effect of alcohol	2.64792
Other disorders of peritoneum	Accidental cut, puncture, perforation, or hemorrhage during medical care	2.64685
Traumatic pneumothorax and hemothorax	Motor vehicle traffic accident of unspecified nature	2.64613
Other perinatal jaundice	Conditions involving the integument and temperature regulation of fetus and newborn	2.6443
Other congenital anomalies of nervous system	Infections specific to the perinatal period	2.64189
Contusion of trunk	Fall on or from stairs or steps	2.64159
Congenital anomalies of genital organs	Single liveborn	2.64066
Contusion of face, scalp, and neck except eye(s)	Motor vehicle traffic accident involving collision with pedestrian	2.63933
Schizophrenic psychoses	Unspecified intellectual disabilities	2.63654
Other and unspecified intracranial hemorrhage following injury	Fall on same level from slipping, tripping, or stumbling	2.63448
Fracture of one or more phalanges of hand	Other open wound of head	2.63276
Other and unspecified intracranial hemorrhage following injury	Other and unspecified fall	2.63262
Vascular insufficiency of intestine	Other disorders of intestine	2.63159
Malignant neoplasm of kidney and other and unspecified urinary organs	Secondary and unspecified malignant neoplasm of lymph nodes	2.63085
Toxic effect of alcohol	Place of occurrence	2.62982
Other diseases of lung	Foreign body in trachea, bronchus, and lung	2.62749
Fracture of vertebral column with spinal cord lesion	Fracture of clavicle	2.62736
Drug dependence	Housing, household, and economic circumstances	2.62691
Other and unqualified skull fractures	Other open wound of head	2.62671
Fracture of vault of skull	Fracture of vertebral column without mention of spinal cord lesion	2.62551
Cerebral laceration and contusion	Fall on or from ladders or scaffolding	2.62427
Contusion of face, scalp, and neck except eye(s)	Other and unspecified fall	2.62289
Infections specific to the perinatal period	Twin, mate liveborn	2.62245
Other congenital anomalies of nervous system	Congenital anomalies of urinary system	2.62208
Fetus or newborn affected by maternal conditions which may be unrelated to present pregnancy	Infections specific to the perinatal period	2.62173
Other open wound of head	Open wound of elbow, forearm, and wrist	2.62031
Fracture of pelvis	Contusion of lower limb and of other and unspecified sites	2.61971
Slow fetal growth and fetal malnutrition	Observation and evaluation of newborns and infants for suspected condition not found	2.61957
Nondependent abuse of drugs	Toxic effect of alcohol	2.61861
Fracture of clavicle	Injury to other intra-abdominal organs	2.61843
Other congenital anomalies of circulatory system	Twin, mate liveborn	2.61832
Disorders relating to long gestation and high birthweight	Birth trauma	2.6177
Disorders relating to short gestation and unspecified low birthweight	Need for other prophylactic vaccination and inoculation against single diseases	2.61713
Fetus or newborn affected by maternal conditions which may be unrelated to present pregnancy	Need for other prophylactic vaccination and inoculation against single diseases	2.61684
Fracture of clavicle	Fracture of ankle	2.61628
Old myocardial infarction	Other forms of chronic ischemic heart disease	2.61436
Fetus or newborn affected by complications of placenta, cord, and membranes	Observation and evaluation of newborns and infants for suspected condition not found	2.61431
Fracture of face bones	Traumatic pneumothorax and hemothorax	2.61401
Atopic dermatitis and related conditions	Hematological disorders of fetus and newborn	2.6127
Fracture of humerus	Injury to heart and lung	2.61136
Malignant neoplasm of colon	Secondary malignant neoplasm of respiratory and digestive systems	2.61071
Fracture of rib(s), sternum, larynx, and trachea	Open wound of finger(s)	2.60865
Noninfective disorders of lymphatic channels	Other cellulitis and abscess	2.60595
Drug psychoses	Poisoning by psychotropic agents	2.60458
Fracture of clavicle	Fracture of humerus	2.60319
Bacterial meningitis	Other cerebral degenerations	2.6026
Personal history of allergy to medicinal agents	Family history of certain chronic disabling diseases	2.60226
Fracture of rib(s), sternum, larynx, and trachea	Other open wound of head	2.60153
Secondary malignant neoplasm of other specified sites	Other specified personal exposures and history presenting hazards to health	2.60099
Meningitis of unspecified cause	Subarachnoid hemorrhage	2.59782
Other open wound of head	Fall on or from stairs or steps	2.59692
Other malignant neoplasm of lymphoid and histiocytic tissue	Disorders involving the immune mechanism	2.594
Other disorders of biliary tract	Diseases of pancreas	2.59319
Certain congenital musculoskeletal deformities	Other and ill-defined conditions originating in the perinatal period	2.59281
Spinal cord injury without evidence of spinal bone injury	Fall on same level from slipping, tripping, or stumbling	2.59222
Injury to other intra-abdominal organs	Motor vehicle traffic accident involving collision with pedestrian	2.59152
Fracture of radius and ulna	Other motor vehicle traffic accident involving collision on the highway	2.59129
Other nutritional deficiencies	Nonspecific findings on examination of blood	2.58993
Fetal and neonatal hemorrhage	Twin, mate liveborn	2.58851
Bacterial infection in conditions classified elsewhere and of unspecified site	Other disorders of urethra and urinary tract	2.58808
Acute and subacute endocarditis	Arterial embolism and thrombosis	2.58755
Nutritional marasmus	Symptoms concerning nutrition, metabolism, and development	2.58715
Bacterial infection in conditions classified elsewhere and of unspecified site	Intracranial and intraspinal abscess	2.58546
Other open wound of head	Superficial injury of hip, thigh, leg, and ankle	2.58509
Diseases of esophagus	Foreign body in mouth, esophagus, and stomach	2.58453
Other open wound of head	Motor vehicle traffic accident of unspecified nature	2.58418
Problems with limbs and other problems	Convalescence and palliative care	2.58152
Fracture of humerus	Fracture of other and unspecified parts of femur	2.57978
Acute and subacute necrosis of liver	Acute renal failure	2.57788
Other bacterial diseases	Certain adverse effects, not elsewhere classified	2.57787
Regional enteritis	Other disorders of intestine	2.57715
Malignant neoplasm of brain	Other conditions of brain	2.57706
Malignant neoplasm of stomach	Other specified personal exposures and history presenting hazards to health	2.57639
Hematological disorders of fetus and newborn	Conditions involving the integument and temperature regulation of fetus and newborn	2.5756
Drug dependence	Suicide and self-inflicted poisoning by solid or liquid substances	2.57536
Candidiasis	Other and unspecified infectious and parasitic diseases	2.57453
Occlusion of cerebral arteries	Symptoms involving head and neck	2.57422
Fetus or newborn affected by other complications of labor and delivery	Need for other prophylactic vaccination and inoculation against single diseases	2.57266
Fetus or newborn affected by maternal conditions which may be unrelated to present pregnancy	Hematological disorders of fetus and newborn	2.57033
Malignant neoplasm of gallbladder and extrahepatic bile ducts	Secondary and unspecified malignant neoplasm of lymph nodes	2.5697
Pneumonitis due to solids and liquids	Inhalation and ingestion of food causing obstruction of respiratory tract or suffocation	2.56947
Portal vein thrombosis	Vascular insufficiency of intestine	2.5682
Fracture of rib(s), sternum, larynx, and trachea	Injury, other and unspecified	2.56757
Bacterial infection in conditions classified elsewhere and of unspecified site	Acute and subacute endocarditis	2.56697
Anal fissure and fistula	Other and ill-defined conditions originating in the perinatal period	2.56651
Fetus or newborn affected by complications of placenta, cord, and membranes	Need for other prophylactic vaccination and inoculation against single diseases	2.56644
Noninfective disorders of lymphatic channels	Body mass index	2.56632
Acute myocardial infarction	Other forms of chronic ischemic heart disease	2.56438
Schizophrenic psychoses	Psychotropic agents causing adverse effects in therapeutic use	2.56386
Hemiplegia and hemiparesis	Visual disturbances	2.56297
Duodenal ulcer	Gastritis and duodenitis	2.56274
Bacterial infection in conditions classified elsewhere and of unspecified site	Septic arterial embolism	2.56215
Other perinatal jaundice	Need for other prophylactic vaccination and inoculation against single diseases	2.56058
Infections of kidney	Other disorders of bladder	2.55698
Secondary and unspecified malignant neoplasm of lymph nodes	Other specified personal exposures and history presenting hazards to health	2.55618
Coagulation defects	Liver abscess and sequelae of chronic liver disease	2.55551
Health supervision of infant or child	Elective surgery for purposes other than remedying health states	2.55523
Other congenital anomalies of nervous system	Other perinatal jaundice	2.55514
Infections specific to the perinatal period	Other multiple, mates all liveborn	2.55141
Fracture of rib(s), sternum, larynx, and trachea	Other, multiple, and ill-defined dislocations	2.55
Other disorders of stomach and duodenum	Other symptoms involving abdomen and pelvis	2.54921
Atherosclerosis	Arterial embolism and thrombosis	2.54903
Slow fetal growth and fetal malnutrition	Infections specific to the perinatal period	2.54747
Affective psychoses	Adjustment reaction	2.54661
Lymphoid leukemia	Primarily systemic agents causing adverse effects in therapeutic use	2.54658
Other and unspecified intracranial hemorrhage following injury	Other motor vehicle traffic accident involving collision with another motor vehicle	2.54563
Intrauterine hypoxia and birth asphyxia	Other respiratory conditions of fetus and newborn	2.54411
Diseases of mitral valve	Chronic pulmonary heart disease	2.54367
Fracture of tibia and fibula	Motor vehicle traffic accident due to loss of control, without collision on the highway	2.54344
Other perinatal jaundice	Need for prophylactic vaccination and inoculation against bacterial diseases	2.54196
Other and unspecified disorders of metabolism	Hemiplegia and hemiparesis	2.54154
Other respiratory conditions of fetus and newborn	Conditions involving the integument and temperature regulation of fetus and newborn	2.54053
Herpes simplex	Primarily systemic agents causing adverse effects in therapeutic use	2.5404
Personality disorders	Drug dependence	2.53997
Infections specific to the perinatal period	Single liveborn	2.53975
Other open wound of head	Other motor vehicle traffic accident involving collision on the highway	2.53847
Other and ill-defined conditions originating in the perinatal period	Need for other prophylactic vaccination and inoculation against single diseases	2.53809
Diseases of other endocardial structures	Chronic pulmonary heart disease	2.53802
Thyrotoxicosis with or without goiter	Agents primarily affecting the cardiovascular system causing adverse effects in therapeutic use	2.53618
Disorders relating to long gestation and high birthweight	Endocrine and metabolic disturbances specific to the fetus and newborn	2.5361
Secondary malignant neoplasm of respiratory and digestive systems	Primarily systemic agents causing adverse effects in therapeutic use	2.53529
Superficial injury of face, neck, and scalp except eye	Other and unspecified fall	2.53468
Other diseases due to viruses and Chlamydiae	Candidiasis	2.53417
Other diseases of spinal cord	Pain, not elsewhere classified	2.53105
Endocrine and metabolic disturbances specific to the fetus and newborn	Need for other prophylactic vaccination and inoculation against single diseases	2.53082
Other hernia of abdominal cavity, with obstruction, but without mention of gangrene	Other disorders of intestine	2.53012
Hypertensive heart disease	Cardiomyopathy	2.52988
Visual disturbances	Symptoms involving head and neck	2.52928
Other disorders of intestine	Attention to artificial openings	2.5289
Malignant neoplasm of female breast	Secondary and unspecified malignant neoplasm of lymph nodes	2.52757
Other mycoses	Aplastic anemia	2.52696
Inguinal hernia	Fetal and neonatal hemorrhage	2.52667
Multiple myeloma and immunoproliferative neoplasms	Primarily systemic agents causing adverse effects in therapeutic use	2.52601
Fetal and neonatal hemorrhage	Single liveborn	2.52585
Other aneurysm	Other disorders of arteries and arterioles	2.52503
Fetus or newborn affected by complications of placenta, cord, and membranes	Respiratory distress syndrome	2.52465
Empyema	Pneumothorax	2.52392
Other congenital anomalies of nervous system	Respiratory distress syndrome	2.52297
Other open wound of head	Spinal cord injury without evidence of spinal bone injury	2.52226
Disorders relating to short gestation and unspecified low birthweight	Single liveborn	2.52204
Fracture of base of skull	Fracture of tibia and fibula	2.52028
Aortic aneurysm and dissection	Other congenital anomalies of heart	2.51935
Hypotension	Other central nervous system depressants and anesthetics causing adverse effects in therapeutic use	2.519
Injury to kidney	Other open wound of head	2.51833
Subarachnoid, subdural, and extradural hemorrhage, following injury	Contusion of eye and adnexa	2.514
Subarachnoid, subdural, and extradural hemorrhage, following injury	Open wound of ear	2.50976
Multiple myeloma and immunoproliferative neoplasms	Organ or tissue replaced by transplant	2.50955
Glaucoma	Blindness and low vision	2.50874
Fracture of face bones	Fracture of clavicle	2.50653
Varicose veins of other sites	Personal history of mental disorder	2.50516
Human immunodeficiency virus [HIV] disease	Herpes simplex	2.50484
Fracture of tibia and fibula	Injury to spleen	2.50406
Certain early complications of trauma	Motor vehicle traffic accident due to loss of control, without collision on the highway	2.50289
Disorders of conjunctiva	Fracture of radius and ulna	2.50057
Other congenital anomalies of circulatory system	Congenital anomalies of genital organs	2.49881
Fracture of radius and ulna	Injury to pelvic organs	2.49802
Disorders relating to short gestation and unspecified low birthweight	Need for prophylactic vaccination and inoculation against bacterial diseases	2.49795
Herpes simplex	Aplastic anemia	2.49706
Fracture of humerus	Motor vehicle traffic accident due to loss of control, without collision on the highway	2.49499
Disorders relating to long gestation and high birthweight	Special investigations and examinations	2.49271
Other congenital anomalies of limbs	Single liveborn	2.49043
Infections specific to the perinatal period	Conditions involving the integument and temperature regulation of fetus and newborn	2.49036
Other open wound of head	Certain early complications of trauma	2.49018
Facial nerve disorders	Symptoms involving head and neck	2.49
Viral hepatitis	Portal vein thrombosis	2.48934
Influenza	Chronic bronchitis	2.48859
Fracture of base of skull	Fracture of rib(s), sternum, larynx, and trachea	2.48672
Chronic ulcer of skin	Osteitis deformans and osteopathies associated with other disorders classified elsewhere	2.48549
Fracture of vertebral column with spinal cord lesion	Motor vehicle traffic accident due to loss of control, without collision on the highway	2.48538
Other complications of procedures, not elsewhere classified	Surgical operation and other surgical procedures as the cause of abnormal reaction of patient, or of later complication, without mention of misadventure at the time of operation	2.48517
Disorders of parathyroid gland	Disorders of adrenal glands	2.48491
Malignant neoplasm of gallbladder and extrahepatic bile ducts	Cholelithiasis	2.48453
Fracture of rib(s), sternum, larynx, and trachea	Fall on or from stairs or steps	2.48407
Acute and subacute endocarditis	Osteomyelitis, periostitis, and other infections involving bone	2.48361
Traumatic pneumothorax and hemothorax	Other open wound of head	2.48094
Other disorders of liver	Accidental poisoning by analgesics, antipyretics, and antirheumatics	2.47933
Inflammatory and toxic neuropathy	Disorders of function of stomach	2.47884
Other alveolar and parietoalveolar pneumopathy	Hormones and synthetic substitutes causing adverse effects in therapeutic use	2.47875
Fracture of scapula	Fall on or from stairs or steps	2.47793
Fracture of face bones	Injury to kidney	2.47749
Fracture of base of skull	Certain early complications of trauma	2.47713
Fracture of other and unspecified parts of femur	Injury to other intra-abdominal organs	2.47686
Birth trauma	Elective surgery for purposes other than remedying health states	2.47652
Inguinal hernia	Respiratory distress syndrome	2.47364
Drug dependence	Asymptomatic human immunodeficiency virus [HIV] infection status	2.47245
Fetal and neonatal hemorrhage	Other multiple, mates all liveborn	2.47232
Injury to liver	Other open wound of head	2.47158
Multiple myeloma and immunoproliferative neoplasms	Other specified personal exposures and history presenting hazards to health	2.47009
Cerebral laceration and contusion	Motor vehicle traffic accident due to loss of control, without collision on the highway	2.46996
Fracture of rib(s), sternum, larynx, and trachea	Superficial injury of hip, thigh, leg, and ankle	2.46994
Fracture of base of skull	Motor vehicle traffic accident due to loss of control, without collision on the highway	2.46821
Atopic dermatitis and related conditions	Other congenital anomalies of circulatory system	2.46759
Other and unqualified skull fractures	Traumatic pneumothorax and hemothorax	2.46705
Congenital anomalies of ear, face, and neck	Need for other prophylactic vaccination and inoculation against single diseases	2.46546
Diseases of the oral soft tissues, excluding lesions specific for gingiva and tongue	Complications of medical care, not elsewhere classified	2.46402
Intracranial and intraspinal abscess	Antibiotics causing adverse effects in therapeutic use	2.46389
Cerebral laceration and contusion	Other fall from one level to another	2.46349
Disorders of function of stomach	Nephritis and nephropathy, not specified as acute or chronic	2.46143
Bronchiectasis	Postinflammatory pulmonary fibrosis	2.46126
Osteomyelitis, periostitis, and other infections involving bone	Antibiotics causing adverse effects in therapeutic use	2.46083
Other congenital anomalies of nervous system	Other respiratory conditions of fetus and newborn	2.46
Other alveolar and parietoalveolar pneumopathy	Other dependence on machines	2.45906
Pneumonia in infectious diseases classified elsewhere	Other diseases of lung	2.45903
Other and ill-defined conditions originating in the perinatal period	Single liveborn	2.45848
Other retinal disorders	Blindness and low vision	2.45775
Peritonitis	Liver abscess and sequelae of chronic liver disease	2.45689
Encephalitis, myelitis, and encephalomyelitis	Epilepsy	2.45111
Alcoholic psychoses	Fight, brawl, and rape	2.45033
Other cerebral degenerations	Intracerebral hemorrhage	2.45009
Fracture of clavicle	Subarachnoid, subdural, and extradural hemorrhage, following injury	2.44864
Other bacterial diseases	Bacterial infection in conditions classified elsewhere and of unspecified site	2.4486
Secondary malignant neoplasm of respiratory and digestive systems	Other specified personal exposures and history presenting hazards to health	2.44825
Other open wound of head	Superficial injury of face, neck, and scalp except eye	2.4473
Cerebral laceration and contusion	Injury to heart and lung	2.44701
Dermatitis due to substances taken internally	Primarily systemic agents causing adverse effects in therapeutic use	2.44667
Malignant neoplasm of female breast	Primarily systemic agents causing adverse effects in therapeutic use	2.44625
Nonspecific findings on examination of blood	Agents primarily affecting blood constituents causing adverse effects in therapeutic use	2.44554
Herpes simplex	Other malignant neoplasm of lymphoid and histiocytic tissue	2.44522
Intestinal infections due to other organisms	Other diseases due to viruses and Chlamydiae	2.44472
Fracture of vertebral column without mention of spinal cord lesion	Open wound of elbow, forearm, and wrist	2.44437
Cerebral laceration and contusion	Other and unspecified fall	2.4412
Congenital anomalies of genital organs	Disorders relating to short gestation and unspecified low birthweight	2.43991
Peritonitis	Other symptoms involving abdomen and pelvis	2.43896
Fracture of face bones	Fracture of pelvis	2.43795
Diverticula of intestine	Other disorders of intestine	2.43751
Congenital anomalies of ear, face, and neck	Other respiratory conditions of fetus and newborn	2.43727
Fracture of face bones	Fall on or from stairs or steps	2.43549
Human immunodeficiency virus [HIV] disease	Drug dependence	2.4339
Elective surgery for purposes other than remedying health states	Special investigations and examinations	2.43357
Other disorders of bone and cartilage	Curvature of spine	2.43351
Nephritis and nephropathy, not specified as acute or chronic	Chronic renal failure	2.43344
Congenital anomalies of eye	Disorders relating to short gestation and unspecified low birthweight	2.43339
Other retinal disorders	Perinatal disorders of digestive system	2.43246
Septicemia	Arthropathy associated with infections	2.42943
Other retinal disorders	Infections specific to the perinatal period	2.42888
Dermatitis due to substances taken internally	Arthropathy associated with infections	2.42552
Poisoning by psychotropic agents	Housing, household, and economic circumstances	2.42418
Fracture of humerus	Other open wound of head	2.42353
Other disorders of male genital organs	Disorders of muscle, ligament, and fascia	2.42346
Nondependent abuse of drugs	Poisoning by solid or liquid substances, undetermined whether accidentally or purposely inflicted	2.42272
Other and unspecified disorders of metabolism	Visual disturbances	2.42258
Fracture of radius and ulna	Fracture of neck of femur	2.42234
Strabismus and other disorders of binocular eye movements	Subarachnoid hemorrhage	2.42146
Other open wound of head	Contusion of face, scalp, and neck except eye(s)	2.41866
Other and unspecified infectious and parasitic diseases	Aplastic anemia	2.41857
Affective psychoses	Psychotropic agents causing adverse effects in therapeutic use	2.41842
Lymphosarcoma and reticulosarcoma	Diseases of white blood cells	2.41774
Noninfective disorders of lymphatic channels	Other disorders of circulatory system	2.41746
Inguinal hernia	Slow fetal growth and fetal malnutrition	2.41573
Fracture of clavicle	Other open wound of head	2.41522
Other congenital anomalies of circulatory system	Conditions involving the integument and temperature regulation of fetus and newborn	2.41457
Malignant neoplasm of liver and intrahepatic bile ducts	Other symptoms involving abdomen and pelvis	2.41311
Lymphoid leukemia	Other specified personal exposures and history presenting hazards to health	2.41301
Conditions involving the integument and temperature regulation of fetus and newborn	Twin, mate liveborn	2.41194
Other mycoses	Antibiotics causing adverse effects in therapeutic use	2.40981
Fracture of face bones	Open wound of knee, leg [except thigh], and ankle	2.40968
Primarily systemic agents causing adverse effects in therapeutic use	Other specified personal exposures and history presenting hazards to health	2.40815
Congenital anomalies of genital organs	Other respiratory conditions of fetus and newborn	2.40656
Fracture of vault of skull	Motor vehicle traffic accident due to loss of control, without collision on the highway	2.4047
Fracture of neck of femur	Other motor vehicle traffic accident involving collision with another motor vehicle	2.40359
Endocrine and metabolic disturbances specific to the fetus and newborn	Observation and evaluation of newborns and infants for suspected condition not found	2.40341
Fracture of vertebral column without mention of spinal cord lesion	Fracture of vertebral column with spinal cord lesion	2.40227
Traumatic pneumothorax and hemothorax	Contusion of trunk	2.40156
Fracture of pelvis	Open wound of elbow, forearm, and wrist	2.40096
Fracture of vertebral column without mention of spinal cord lesion	Other fall from one level to another	2.39935
Respiratory distress syndrome	Conditions involving the integument and temperature regulation of fetus and newborn	2.39924
Human immunodeficiency virus [HIV] disease	Candidiasis	2.39863
Other open wound of head	Fall on or from ladders or scaffolding	2.39794
Congenital anomalies of genital organs	Other and ill-defined conditions originating in the perinatal period	2.39771
Other congenital anomalies of circulatory system	Fetus or newborn affected by complications of placenta, cord, and membranes	2.39696
Fracture of vault of skull	Fracture of rib(s), sternum, larynx, and trachea	2.39694
Nutritional marasmus	Other disorders of stomach and duodenum	2.39591
Affective psychoses	Accidental poisoning by analgesics, antipyretics, and antirheumatics	2.3958
Fracture of radius and ulna	Fall on or from stairs or steps	2.39503
Spondylosis and allied disorders	Fracture of vertebral column with spinal cord lesion	2.39435
Meningitis of unspecified cause	Respiratory distress syndrome	2.39224
Endocrine and metabolic disturbances specific to the fetus and newborn	Twin, mate liveborn	2.39223
Bacterial infection in conditions classified elsewhere and of unspecified site	Inflammatory disease of cervix, vagina, and vulva	2.39141
Other disorders of peritoneum	Attention to artificial openings	2.38954
Other diseases of lung	Foreign body in pharynx and larynx	2.38914
Mononeuritis of upper limb and mononeuritis multiplex	Disorders of muscle, ligament, and fascia	2.38727
Hemorrhoids	Other disorders of intestine	2.38692
Fracture of other and unspecified parts of femur	Other open wound of head	2.38658
Fracture of neck of femur	Certain early complications of trauma	2.38481
Affective psychoses	Toxic effect of alcohol	2.38406
Fetus or newborn affected by other complications of labor and delivery	Hematological disorders of fetus and newborn	2.38395
Benign neoplasm of other parts of digestive system	Gastritis and duodenitis	2.3783
Hypertensive heart and renal disease	Cardiomyopathy	2.37534
Uterine leiomyoma	Iron deficiency anemias	2.37527
Fracture of face bones	Cerebral laceration and contusion	2.37461
Contact dermatitis and other eczema	Antibiotics causing adverse effects in therapeutic use	2.37365
Special symptoms or syndromes, not elsewhere classified	Suicide and self-inflicted poisoning by solid or liquid substances	2.37351
Complications affecting specified body systems, not elsewhere classified	Surgical operation and other surgical procedures as the cause of abnormal reaction of patient, or of later complication, without mention of misadventure at the time of operation	2.37209
Slow fetal growth and fetal malnutrition	Single liveborn	2.37192
Other congenital anomalies of nervous system	Disorders relating to short gestation and unspecified low birthweight	2.36969
Fracture of clavicle	Fracture of other and unspecified parts of femur	2.36883
Congenital anomalies of genital organs	Special investigations and examinations	2.36865
Disorders of the autonomic nervous system	Other retinal disorders	2.36836
Duodenal ulcer	Other disorders of stomach and duodenum	2.3668
Fracture of vertebral column without mention of spinal cord lesion	Fracture of metacarpal bone(s)	2.36656
Hypertensive renal disease	Nephritis and nephropathy, not specified as acute or chronic	2.36378
Pilonidal cyst	Other and ill-defined conditions originating in the perinatal period	2.36309
Fracture of base of skull	Fracture of one or more tarsal and metatarsal bones	2.36252
Fracture of base of skull	Open wound of elbow, forearm, and wrist	2.36252
Hemorrhoids	Other disorders of stomach and duodenum	2.3621
Acute bronchitis and bronchiolitis	Other diseases of respiratory system	2.36209
Other and unqualified skull fractures	Fracture of rib(s), sternum, larynx, and trachea	2.36184
Certain congenital musculoskeletal deformities	Observation and evaluation of newborns and infants for suspected condition not found	2.36043
Organic sleep disorders	Body mass index	2.35916
Malignant neoplasm of ovary and other uterine adnexa	Acute pulmonary heart disease	2.35847
Conditions involving the integument and temperature regulation of fetus and newborn	Elective surgery for purposes other than remedying health states	2.35745
Gastritis and duodenitis	Other disorders of stomach and duodenum	2.35709
Chronic glomerulonephritis	Chronic renal failure	2.35702
Atopic dermatitis and related conditions	Twin, mate liveborn	2.35641
Calculus of kidney and ureter	Other disorders of bladder	2.35494
Other diseases of spinal cord	Other disorders of bone and cartilage	2.35473
Other malignant neoplasm of lymphoid and histiocytic tissue	Aplastic anemia	2.3534
Arthropathy associated with infections	Infection with drug-resistant microorganisms	2.35332
Disorders of the pituitary gland and its hypothalamic control	Disorders of adrenal glands	2.35296
Other retinal disorders	Disorders of function of stomach	2.35293
Fracture of pelvis	Other open wound of head	2.35293
Other cellulitis and abscess	Osteomyelitis, periostitis, and other infections involving bone	2.35198
Fracture of clavicle	Cerebral laceration and contusion	2.35093
Other bacterial pneumonia	Other diseases of lung	2.35075
Fracture of ankle	Other open wound of head	2.35051
Slow fetal growth and fetal malnutrition	Fetal and neonatal hemorrhage	2.34861
Slow fetal growth and fetal malnutrition	Respiratory distress syndrome	2.34442
Drug psychoses	Poisoning by analgesics, antipyretics, and antirheumatics	2.34407
Other open wound of head	Other fall from one level to another	2.34395
Inflammatory and toxic neuropathy	Osteitis deformans and osteopathies associated with other disorders classified elsewhere	2.3425
Injury to heart and lung	Fall on or from ladders or scaffolding	2.34137
Fracture of base of skull	Fracture of humerus	2.33901
Hemorrhoids	Varicose veins of other sites	2.33884
Other congenital anomalies of heart	Other congenital anomalies of circulatory system	2.3382
Other diseases of endocardium	Diseases of hard tissues of teeth	2.33789
Intracranial and intraspinal abscess	Peritonitis	2.33755
Malignant neoplasm of brain	Epilepsy	2.33707
Pleurisy	Abscess of lung and mediastinum	2.33662
Chronic liver disease and cirrhosis	Personal history of mental disorder	2.33558
Late effects of other and unspecified external causes	Personal history of malignant neoplasm	2.33455
Other and unspecified intracranial hemorrhage following injury	Other open wound of head	2.32765
Fracture of vertebral column without mention of spinal cord lesion	Motor vehicle traffic accident of unspecified nature	2.3263
Malignant neoplasm of esophagus	Artificial opening status	2.32507
Cystitis	Other procedures, without mention of misadventure at the time of procedure, as the cause of abnormal reaction of patient, or of later complication	2.32248
Pneumonia in infectious diseases classified elsewhere	Certain adverse effects, not elsewhere classified	2.32207
Strabismus and other disorders of binocular eye movements	Other and ill-defined cerebrovascular disease	2.31933
Occlusion of cerebral arteries	Symptoms involving nervous and musculoskeletal systems	2.319
Nutritional marasmus	Body mass index	2.31812
Other bacterial pneumonia	Foreign body in pharynx and larynx	2.31796
Atherosclerosis	Osteitis deformans and osteopathies associated with other disorders classified elsewhere	2.31732
Fracture of humerus	Injury to liver	2.31629
Contact dermatitis and other eczema	Dermatitis due to substances taken internally	2.31449
Subarachnoid, subdural, and extradural hemorrhage, following injury	Other open wound of head	2.31386
Human immunodeficiency virus [HIV] disease	Aplastic anemia	2.3132
Lymphoid leukemia	Aplastic anemia	2.31171
Other open wound of head	Fall from or out of building or other structure	2.3104
Injury to spleen	Motor vehicle traffic accident involving collision with pedestrian	2.31028
Artificial opening status	Other dependence on machines	2.31018
Pain, not elsewhere classified	Sedatives and hypnotics causing adverse effects in therapeutic use	2.30828
Coagulation defects	Varicose veins of other sites	2.30525
Cardiomyopathy	Heart failure	2.30477
Congenital anomalies of genital organs	Other perinatal jaundice	2.30406
Other cellulitis and abscess	Arthropathy associated with other disorders classified elsewhere	2.3024
Benign neoplasm of other parts of digestive system	Gastrointestinal hemorrhage	2.30208
Polyarteritis nodosa and allied conditions	Hormones and synthetic substitutes causing adverse effects in therapeutic use	2.30144
Fracture of base of skull	Traumatic pneumothorax and hemothorax	2.30032
Fracture of one or more tarsal and metatarsal bones	Other open wound of head	2.29881
Other conditions of brain	Intracerebral hemorrhage	2.29616
Fracture of neck of femur	Other fall from one level to another	2.29525
Bulbus cordis anomalies and anomalies of cardiac septal closure	Other congenital anomalies of limbs	2.29507
Malignant neoplasm of rectum, rectosigmoid junction, and anus	Intestinal obstruction without mention of hernia	2.29406
Infections of kidney	Other disorders of kidney and ureter	2.29398
Malignant neoplasm of brain	Hemiplegia and hemiparesis	2.29218
Fracture of vault of skull	Fracture of pelvis	2.29201
Fracture of vertebral column with spinal cord lesion	Other open wound of head	2.2918
Other retinal disorders	Fetal and neonatal hemorrhage	2.29046
Meningitis of unspecified cause	Other cerebral degenerations	2.28947
Fracture of base of skull	Open wound of knee, leg [except thigh], and ankle	2.28842
Malignant neoplasm of colon	Other disorders of peritoneum	2.28713
Bacterial infection in conditions classified elsewhere and of unspecified site	Osteitis deformans and osteopathies associated with other disorders classified elsewhere	2.2866
Myeloid leukemia	Dermatitis due to substances taken internally	2.28511
Gastrojejunal ulcer	Other postsurgical states	2.28423
Fracture of humerus	Injury to spleen	2.28366
Nutritional marasmus	Aplastic anemia	2.28206
Subarachnoid, subdural, and extradural hemorrhage, following injury	Motor vehicle traffic accident involving collision with pedestrian	2.2811
Diffuse diseases of connective tissue	Rheumatoid arthritis and other inflammatory polyarthropathies	2.28031
Disorders of conjunctiva	Fracture of face bones	2.27874
Atopic dermatitis and related conditions	Single liveborn	2.27872
Affective psychoses	Drug dependence	2.27727
Congenital anomalies of respiratory system	Other and ill-defined conditions originating in the perinatal period	2.27719
Diseases of the oral soft tissues, excluding lesions specific for gingiva and tongue	Antibiotics causing adverse effects in therapeutic use	2.27573
Atherosclerosis	Osteomyelitis, periostitis, and other infections involving bone	2.27328
Fracture of base of skull	Fracture of pelvis	2.27311
Intracranial and intraspinal abscess	Nonspecific findings on examination of blood	2.27209
Hematological disorders of fetus and newborn	Single liveborn	2.27184
Bacterial infection in conditions classified elsewhere and of unspecified site	Osteomyelitis, periostitis, and other infections involving bone	2.27119
Fracture of vault of skull	Injury to heart and lung	2.27114
Personal history of allergy to medicinal agents	Body mass index	2.26856
Other diseases of spinal cord	Symptoms involving urinary system	2.26778
Coagulation defects	Chronic liver disease and cirrhosis	2.26702
Osteomyelitis, periostitis, and other infections involving bone	Infection with drug-resistant microorganisms	2.26563
Other diseases of spinal cord	Osteomyelitis, periostitis, and other infections involving bone	2.26556
Drug psychoses	Accidental poisoning by analgesics, antipyretics, and antirheumatics	2.26545
Congenital anomalies of genital organs	Endocrine and metabolic disturbances specific to the fetus and newborn	2.26448
Contusion of face, scalp, and neck except eye(s)	Other motor vehicle traffic accident involving collision with another motor vehicle	2.26391
Certain congenital musculoskeletal deformities	Disorders relating to short gestation and unspecified low birthweight	2.26234
Other respiratory conditions of fetus and newborn	Elective surgery for purposes other than remedying health states	2.26217
Fracture of face bones	Certain early complications of trauma	2.26204
Intracerebral hemorrhage	Symptoms involving nervous and musculoskeletal systems	2.26122
Other retinal disorders	Other congenital anomalies of circulatory system	2.26058
Human immunodeficiency virus [HIV] disease	Mononeuritis of lower limb	2.26035
Alcohol dependence syndrome	Effects of reduced temperature	2.26026
Perinatal disorders of digestive system	Single liveborn	2.25895
Postinflammatory pulmonary fibrosis	Other dependence on machines	2.25826
Parkinson's disease	Foreign body in pharynx and larynx	2.25814
Septicemia	Pneumonia in infectious diseases classified elsewhere	2.25773
Chronic bronchitis	Other dependence on machines	2.25651
Acute glomerulonephritis	Acute renal failure	2.25534
Viral hepatitis	Accidental poisoning by analgesics, antipyretics, and antirheumatics	2.25483
Respiratory distress syndrome	Single liveborn	2.2543
Other paralytic syndromes	Intervertebral disc disorders	2.25314
Other malignant neoplasm of lymphoid and histiocytic tissue	Diseases of the oral soft tissues, excluding lesions specific for gingiva and tongue	2.25243
Portal vein thrombosis	Acute and subacute necrosis of liver	2.25237
Malignant neoplasm of stomach	Secondary malignant neoplasm of respiratory and digestive systems	2.25027
Fetus or newborn affected by other complications of labor and delivery	Endocrine and metabolic disturbances specific to the fetus and newborn	2.25014
Bronchiectasis	Other dependence on machines	2.25012
Other congenital anomalies of circulatory system	Fetus or newborn affected by other complications of labor and delivery	2.24998
Drug psychoses	Suicide and self-inflicted poisoning by solid or liquid substances	2.24867
Subarachnoid, subdural, and extradural hemorrhage, following injury	Assault by other and unspecified means	2.24827
Peritonitis	Chronic liver disease and cirrhosis	2.24773
Neurotic disorders	Hyperkinetic syndrome of childhood	2.246
Other mycoses	Primarily systemic agents causing adverse effects in therapeutic use	2.24598
Family history of malignant neoplasm	Family history of certain chronic disabling diseases	2.24515
Fracture of vertebral column with spinal cord lesion	Fracture of tibia and fibula	2.24508
Schizophrenic psychoses	Suicide and self-inflicted poisoning by solid or liquid substances	2.24451
Disorders relating to short gestation and unspecified low birthweight	Hemolytic disease of fetus or newborn, due to isoimmunization	2.24429
Slow fetal growth and fetal malnutrition	Need for other prophylactic vaccination and inoculation against single diseases	2.24408
Malignant neoplasm of trachea, bronchus, and lung	Secondary malignant neoplasm of respiratory and digestive systems	2.24364
Poisoning by central nervous system stimulants	Place of occurrence	2.24308
Alcoholic psychoses	Other psychosocial circumstances	2.24209
Fracture of rib(s), sternum, larynx, and trachea	Cerebral laceration and contusion	2.24111
Congenital anomalies of eye	Need for other prophylactic vaccination and inoculation against single diseases	2.24102
Pain, not elsewhere classified	Other disorders of cervical region	2.24096
Fracture of face bones	Fracture of other and unspecified parts of femur	2.24048
Drug psychoses	Hormones and synthetic substitutes causing adverse effects in therapeutic use	2.23993
Fracture of humerus	Other fall from one level to another	2.23951
Other diseases of respiratory system	Foreign body in trachea, bronchus, and lung	2.2388
Other forms of chronic ischemic heart disease	Family history of certain chronic disabling diseases	2.2387
Bacterial infection in conditions classified elsewhere and of unspecified site	Infection with drug-resistant microorganisms	2.23769
Other conditions of brain	Other and unspecified intracranial hemorrhage	2.23745
Malignant neoplasm of liver and intrahepatic bile ducts	Other disorders of biliary tract	2.2369
Nondependent abuse of drugs	Housing, household, and economic circumstances	2.23571
Other disorders of urethra and urinary tract	Injury to pelvic organs	2.23507
Hydronephrosis	Other disorders of bladder	2.23409
Secondary and unspecified malignant neoplasm of lymph nodes	Primarily systemic agents causing adverse effects in therapeutic use	2.23361
Fracture of vertebral column without mention of spinal cord lesion	Other and unspecified intracranial hemorrhage following injury	2.23208
Chronic ulcer of skin	Arthropathy associated with other disorders classified elsewhere	2.23065
Other malignant neoplasm of lymphoid and histiocytic tissue	Lymphoid leukemia	2.23
Congenital anomalies of respiratory system	Other respiratory conditions of fetus and newborn	2.22984
Fracture of base of skull	Other motor vehicle traffic accident involving collision with another motor vehicle	2.22959
Arthropathy associated with infections	Certain adverse effects, not elsewhere classified	2.22817
Malignant neoplasm of colon	Benign neoplasm of other parts of digestive system	2.22809
Other bacterial pneumonia	Pneumonia in infectious diseases classified elsewhere	2.22607
Schizophrenic psychoses	Poisoning by psychotropic agents	2.22573
Secondary malignant neoplasm of other specified sites	Personal history of malignant neoplasm	2.22528
Arterial embolism and thrombosis	Vascular insufficiency of intestine	2.2252
Nutritional marasmus	Chronic ulcer of skin	2.22448
Candidiasis	Atopic dermatitis and related conditions	2.22423
Viral hepatitis	Accidental poisoning by tranquilizers	2.22277
Other cellulitis and abscess	Osteitis deformans and osteopathies associated with other disorders classified elsewhere	2.22178
Secondary malignant neoplasm of other specified sites	Primarily systemic agents causing adverse effects in therapeutic use	2.21916
Malignant neoplasm of pancreas	Other disorders of stomach and duodenum	2.21865
Fracture of humerus	Fall on same level from slipping, tripping, or stumbling	2.21838
Malignant neoplasm of colon	Other disorders of intestine	2.21759
Other cellulitis and abscess	Arthropathy associated with infections	2.21525
Fracture of neck of femur	Motor vehicle traffic accident involving collision with pedestrian	2.21394
Certain congenital musculoskeletal deformities	Need for other prophylactic vaccination and inoculation against single diseases	2.21367
Contusion of face, scalp, and neck except eye(s)	Motor vehicle traffic accident due to loss of control, without collision on the highway	2.21238
Fracture of vertebral column without mention of spinal cord lesion	Injury to pelvic organs	2.21203
Personal history of malignant neoplasm	Other specified personal exposures and history presenting hazards to health	2.21199
[truncated: 8,110 more rows]
